# Supplementary material for: Milankovitch forcing recorded in gamma ray logs and cyclicity in subsurface Upper Jurassic (Kimmeridgian) Jubaila–lower Arab platform carbonates, Saudi Arabia
Source: Springer Nature journal article supplement (doi:10.1007/s12517-022-10664-8), 2022-08-24
Supplement: 12517_2022_10664_MOESM1_ESM.pdf [file 12517_2022_10664_MOESM1_ESM.pdf]

|          |      |
|----------|------|
| 2133.6   | 16.9 |
| 2133.752 | 17.6 |
| 2133.905 | 17.1 |
| 2134.057 | 16.4 |
| 2134.21  | 15.7 |
| 2134.362 | 15.5 |
| 2134.514 | 15.9 |
| 2134.667 | 16.5 |
| 2134.819 | 16.6 |
| 2134.972 | 16   |
| 2135.124 | 15.5 |
| 2135.276 | 16.1 |
| 2135.429 | 18   |
| 2135.581 | 20.3 |
| 2135.734 | 20.9 |
| 2135.886 | 18.9 |
| 2136.038 | 16.3 |
| 2136.191 | 15.3 |
| 2136.343 | 16.1 |
| 2136.496 | 16.3 |
| 2136.648 | 15.2 |
| 2136.8   | 13.9 |
| 2136.953 | 13.5 |
| 2137.105 | 13.8 |
| 2137.258 | 14   |
| 2137.41  | 13.4 |
| 2137.562 | 12.4 |
| 2137.715 | 12.1 |
| 2137.867 | 12.4 |
| 2138.02  | 12.6 |
| 2138.172 | 12.5 |
| 2138.324 | 12   |
| 2138.477 | 11.4 |
| 2138.629 | 11.3 |
| 2138.782 | 11.9 |
| 2138.934 | 12.6 |
| 2139.086 | 12.7 |
| 2139.239 | 13.1 |
| 2139.391 | 14.6 |
| 2139.544 | 15.9 |
| 2139.696 | 15.2 |
| 2139.848 | 13.4 |
| 2140.001 | 12.7 |
| 2140.153 | 13.3 |
| 2140.306 | 13.7 |
| 2140.458 | 13   |
| 2140.61  | 12.1 |

|          |      |
|----------|------|
| 2140.763 | 11.9 |
| 2140.915 | 13.2 |
| 2141.068 | 15.2 |
| 2141.22  | 16.1 |
| 2141.372 | 16.4 |
| 2141.525 | 16.6 |
| 2141.677 | 16.2 |
| 2141.83  | 15.4 |
| 2141.982 | 14.8 |
| 2142.134 | 14.1 |
| 2142.287 | 13.5 |
| 2142.439 | 13.7 |
| 2142.592 | 14   |
| 2142.744 | 14.1 |
| 2142.896 | 13.9 |
| 2143.049 | 14   |
| 2143.201 | 14.2 |
| 2143.354 | 14.1 |
| 2143.506 | 14.2 |
| 2143.658 | 16.3 |
| 2143.811 | 18.7 |
| 2143.963 | 18.2 |
| 2144.116 | 15.9 |
| 2144.268 | 14.6 |
| 2144.42  | 14.3 |
| 2144.573 | 13.9 |
| 2144.725 | 13.2 |
| 2144.878 | 13   |
| 2145.03  | 13.3 |
| 2145.182 | 13.2 |
| 2145.335 | 11.8 |
| 2145.487 | 10.3 |
| 2145.64  | 9.7  |
| 2145.792 | 9.9  |
| 2145.944 | 10.3 |
| 2146.097 | 10.3 |
| 2146.249 | 10.4 |
| 2146.402 | 10.8 |
| 2146.554 | 11.6 |
| 2146.706 | 12.6 |
| 2146.859 | 13.7 |
| 2147.011 | 14.1 |
| 2147.164 | 13.5 |
| 2147.316 | 13.1 |
| 2147.468 | 13.9 |
| 2147.621 | 14.8 |
| 2147.773 | 14.5 |

|          |      |
|----------|------|
| 2147.926 | 13.5 |
| 2148.078 | 12.5 |
| 2148.23  | 11.8 |
| 2148.383 | 11.1 |
| 2148.535 | 10.4 |
| 2148.688 | 10.3 |
| 2148.84  | 10.8 |
| 2148.992 | 12   |
| 2149.145 | 13.6 |
| 2149.297 | 14.7 |
| 2149.45  | 14.8 |
| 2149.602 | 14.3 |
| 2149.754 | 13.7 |
| 2149.907 | 12.6 |
| 2150.059 | 11.6 |
| 2150.212 | 11.2 |
| 2150.364 | 11.2 |
| 2150.516 | 11.1 |
| 2150.669 | 11.3 |
| 2150.821 | 12.5 |
| 2150.974 | 13.5 |
| 2151.126 | 13.4 |
| 2151.278 | 12.6 |
| 2151.431 | 12   |
| 2151.583 | 11.5 |
| 2151.736 | 11   |
| 2151.888 | 10.3 |
| 2152.04  | 9.8  |
| 2152.193 | 9.7  |
| 2152.345 | 9.9  |
| 2152.498 | 10.6 |
| 2152.65  | 11.1 |
| 2152.802 | 10.8 |
| 2152.955 | 10.6 |
| 2153.107 | 10.6 |
| 2153.26  | 10.6 |
| 2153.412 | 10.7 |
| 2153.564 | 11.1 |
| 2153.717 | 11.6 |
| 2153.869 | 11.7 |
| 2154.022 | 11.7 |
| 2154.174 | 11.4 |
| 2154.326 | 10.7 |
| 2154.479 | 10.3 |
| 2154.631 | 10.4 |
| 2154.784 | 10.2 |
| 2154.936 | 10.1 |

|          |      |
|----------|------|
| 2155.088 | 10.3 |
| 2155.241 | 10.5 |
| 2155.393 | 10.2 |
| 2155.546 | 9.8  |
| 2155.698 | 9.6  |
| 2155.85  | 9.6  |
| 2156.003 | 10.1 |
| 2156.155 | 10.9 |
| 2156.308 | 11.1 |
| 2156.46  | 10.7 |
| 2156.612 | 10.6 |
| 2156.765 | 10.5 |
| 2156.917 | 10.1 |
| 2157.07  | 10.7 |
| 2157.222 | 12.5 |
| 2157.374 | 13.1 |
| 2157.527 | 11.7 |
| 2157.679 | 10.8 |
| 2157.832 | 12.1 |
| 2157.984 | 13.7 |
| 2158.136 | 14   |
| 2158.289 | 13.5 |
| 2158.441 | 13.5 |
| 2158.594 | 13.9 |
| 2158.746 | 13.9 |
| 2158.898 | 13.4 |
| 2159.051 | 12.5 |
| 2159.203 | 11.6 |
| 2159.356 | 11.5 |
| 2159.508 | 12   |
| 2159.66  | 12.3 |
| 2159.813 | 11.7 |
| 2159.965 | 11.2 |
| 2160.118 | 11.4 |
| 2160.27  | 12.1 |
| 2160.422 | 13.2 |
| 2160.575 | 14.2 |
| 2160.727 | 15.3 |
| 2160.88  | 16.9 |
| 2161.032 | 18   |
| 2161.184 | 17.4 |
| 2161.337 | 15.5 |
| 2161.489 | 13.3 |
| 2161.642 | 11.3 |
| 2161.794 | 9.7  |
| 2161.946 | 8.8  |
| 2162.099 | 8.3  |

|          |      |
|----------|------|
| 2162.251 | 8.5  |
| 2162.404 | 9    |
| 2162.556 | 9.5  |
| 2162.708 | 10.2 |
| 2162.861 | 11.2 |
| 2163.013 | 12.3 |
| 2163.166 | 12.1 |
| 2163.318 | 11   |
| 2163.47  | 9.9  |
| 2163.623 | 9.8  |
| 2163.775 | 11.1 |
| 2163.928 | 13.9 |
| 2164.08  | 17.4 |
| 2164.232 | 20.4 |
| 2164.385 | 21.2 |
| 2164.537 | 19.8 |
| 2164.69  | 18.3 |
| 2164.842 | 18.3 |
| 2164.994 | 19.3 |
| 2165.147 | 20.9 |
| 2165.299 | 24   |
| 2165.452 | 28.1 |
| 2165.604 | 30.1 |
| 2165.756 | 28.4 |
| 2165.909 | 25.3 |
| 2166.061 | 23.3 |
| 2166.214 | 23   |
| 2166.366 | 22.9 |
| 2166.518 | 23.1 |
| 2166.671 | 24.1 |
| 2166.823 | 24.6 |
| 2166.976 | 23.2 |
| 2167.128 | 21.2 |
| 2167.28  | 20.1 |
| 2167.433 | 19.1 |
| 2167.585 | 18.3 |
| 2167.738 | 18.7 |
| 2167.89  | 19.6 |
| 2168.042 | 20.7 |
| 2168.195 | 21.9 |
| 2168.347 | 22.1 |
| 2168.5   | 20.4 |
| 2168.652 | 18.2 |
| 2168.804 | 16.3 |
| 2168.957 | 15.1 |
| 2169.109 | 14.5 |
| 2169.262 | 14.4 |

|          |      |
|----------|------|
| 2169.414 | 14.9 |
| 2169.566 | 15.5 |
| 2169.719 | 15.5 |
| 2169.871 | 15.2 |
| 2170.024 | 15.1 |
| 2170.176 | 15.4 |
| 2170.328 | 16.3 |
| 2170.481 | 17.9 |
| 2170.633 | 19.1 |
| 2170.786 | 18.7 |
| 2170.938 | 17.1 |
| 2171.09  | 16.2 |
| 2171.243 | 17.3 |
| 2171.395 | 19.6 |
| 2171.548 | 21.6 |
| 2171.7   | 22.2 |
| 2171.852 | 21.8 |
| 2172.005 | 21.5 |
| 2172.157 | 22.2 |
| 2172.31  | 23.3 |
| 2172.462 | 23.7 |
| 2172.614 | 23.3 |
| 2172.767 | 22.6 |
| 2172.919 | 22   |
| 2173.072 | 21.3 |
| 2173.224 | 20.2 |
| 2173.376 | 19.6 |
| 2173.529 | 20.2 |
| 2173.681 | 21.3 |
| 2173.834 | 22   |
| 2173.986 | 22.3 |
| 2174.138 | 22.6 |
| 2174.291 | 22.6 |
| 2174.443 | 22.5 |
| 2174.596 | 22.7 |
| 2174.748 | 22.9 |
| 2174.9   | 23   |
| 2175.053 | 22.9 |
| 2175.205 | 22.5 |
| 2175.358 | 21.7 |
| 2175.51  | 20.9 |
| 2175.662 | 20.7 |
| 2175.815 | 20.1 |
| 2175.967 | 19.1 |
| 2176.12  | 18.8 |
| 2176.272 | 19.7 |
| 2176.424 | 21   |

|          |      |
|----------|------|
| 2176.577 | 23.2 |
| 2176.729 | 25.6 |
| 2176.882 | 26.1 |
| 2177.034 | 24.9 |
| 2177.186 | 23.8 |
| 2177.339 | 24.2 |
| 2177.491 | 25.3 |
| 2177.644 | 26   |
| 2177.796 | 25.6 |
| 2177.948 | 25.5 |
| 2178.101 | 25.7 |
| 2178.253 | 25.1 |
| 2178.406 | 23.1 |
| 2178.558 | 21.4 |
| 2178.71  | 21.3 |
| 2178.863 | 22.3 |
| 2179.015 | 23.9 |
| 2179.168 | 25.9 |
| 2179.32  | 26.6 |
| 2179.472 | 25   |
| 2179.625 | 23.6 |
| 2179.777 | 24.5 |
| 2179.93  | 25.8 |
| 2180.082 | 26.4 |
| 2180.234 | 26.9 |
| 2180.387 | 26.8 |
| 2180.539 | 25.4 |
| 2180.692 | 24.6 |
| 2180.844 | 24.8 |
| 2180.996 | 25.1 |
| 2181.149 | 25.2 |
| 2181.301 | 25.3 |
| 2181.454 | 26.1 |
| 2181.606 | 26.8 |
| 2181.758 | 26.1 |
| 2181.911 | 24.8 |
| 2182.063 | 24.8 |
| 2182.216 | 25.4 |
| 2182.368 | 25.2 |
| 2182.52  | 24.7 |
| 2182.673 | 24.8 |
| 2182.825 | 25.7 |
| 2182.978 | 26.3 |
| 2183.13  | 25.6 |
| 2183.282 | 23.8 |
| 2183.435 | 23.2 |
| 2183.587 | 23.7 |

|          |      |
|----------|------|
| 2183.74  | 23.6 |
| 2183.892 | 23.9 |
| 2184.044 | 25.1 |
| 2184.197 | 25.6 |
| 2184.349 | 25.4 |
| 2184.502 | 24.9 |
| 2184.654 | 24.3 |
| 2184.806 | 23.8 |
| 2184.959 | 23   |
| 2185.111 | 21.4 |
| 2185.264 | 20.5 |
| 2185.416 | 20.8 |
| 2185.568 | 21.1 |
| 2185.721 | 20.5 |
| 2185.873 | 19.6 |
| 2186.026 | 19.7 |
| 2186.178 | 20.7 |
| 2186.33  | 20.6 |
| 2186.483 | 19.3 |
| 2186.635 | 18.3 |
| 2186.788 | 18.6 |
| 2186.94  | 20.3 |
| 2187.092 | 22.1 |
| 2187.245 | 23.4 |
| 2187.397 | 23.7 |
| 2187.55  | 23.3 |
| 2187.702 | 22.4 |
| 2187.854 | 21.7 |
| 2188.007 | 21.6 |
| 2188.159 | 22.6 |
| 2188.312 | 23.5 |
| 2188.464 | 22.6 |
| 2188.616 | 21.3 |
| 2188.769 | 21   |
| 2188.921 | 20.8 |
| 2189.074 | 20.2 |
| 2189.226 | 19.2 |
| 2189.378 | 18.2 |
| 2189.531 | 17.6 |
| 2189.683 | 17.1 |
| 2189.836 | 16.3 |
| 2189.988 | 16.3 |
| 2190.14  | 17.3 |
| 2190.293 | 18.3 |
| 2190.445 | 19.2 |
| 2190.598 | 20.6 |
| 2190.75  | 21.7 |



|          |      |
|----------|------|
| 2190.902 | 21.8 |
| 2191.055 | 21.5 |
| 2191.207 | 21.1 |
| 2191.36  | 20.3 |
| 2191.512 | 19.4 |
| 2191.664 | 18.9 |
| 2191.817 | 18.4 |
| 2191.969 | 18.6 |
| 2192.122 | 19.7 |
| 2192.274 | 20.6 |
| 2192.426 | 20.2 |
| 2192.579 | 19.8 |
| 2192.731 | 19.8 |
| 2192.884 | 19.8 |
| 2193.036 | 19.3 |
| 2193.188 | 18.9 |
| 2193.341 | 19.2 |
| 2193.493 | 19.8 |
| 2193.646 | 19.3 |
| 2193.798 | 18.2 |
| 2193.95  | 17.4 |
| 2194.103 | 16.8 |
| 2194.255 | 16.6 |
| 2194.408 | 16.7 |
| 2194.56  | 16.5 |
| 2194.712 | 16   |
| 2194.865 | 15.9 |
| 2195.017 | 15.9 |
| 2195.17  | 15.3 |
| 2195.322 | 14.2 |
| 2195.474 | 13.9 |
| 2195.627 | 13.8 |
| 2195.779 | 13.5 |
| 2195.932 | 13.6 |
| 2196.084 | 13.6 |
| 2196.236 | 13.2 |
| 2196.389 | 12.8 |
| 2196.541 | 12.6 |
| 2196.694 | 11.8 |
| 2196.846 | 11.1 |
| 2196.998 | 12   |
| 2197.151 | 14.1 |
| 2197.303 | 15.2 |
| 2197.456 | 14.9 |
| 2197.608 | 14.9 |
| 2197.76  | 15.3 |
| 2197.913 | 14.6 |

|          |      |
|----------|------|
| 2198.065 | 13.4 |
| 2198.218 | 12.8 |
| 2198.37  | 12.6 |
| 2198.522 | 12.6 |
| 2198.675 | 13.2 |
| 2198.827 | 14.5 |
| 2198.98  | 15.2 |
| 2199.132 | 14.5 |
| 2199.284 | 13.7 |
| 2199.437 | 13.9 |
| 2199.589 | 14.6 |
| 2199.742 | 14.7 |
| 2199.894 | 14.2 |
| 2200.046 | 13.9 |
| 2200.199 | 14.3 |
| 2200.351 | 14.7 |
| 2200.504 | 14.4 |
| 2200.656 | 13.8 |
| 2200.808 | 13.5 |
| 2200.961 | 13.4 |
| 2201.113 | 13.4 |
| 2201.266 | 14.1 |
| 2201.418 | 15.2 |
| 2201.57  | 15.8 |
| 2201.723 | 15.7 |
| 2201.875 | 15.9 |
| 2202.028 | 16.6 |
| 2202.18  | 17   |
| 2202.332 | 16.3 |
| 2202.485 | 14.9 |
| 2202.637 | 14   |
| 2202.79  | 13.9 |
| 2202.942 | 14.6 |
| 2203.094 | 16   |
| 2203.247 | 16.9 |
| 2203.399 | 16.1 |
| 2203.552 | 14.3 |
| 2203.704 | 12.8 |
| 2203.856 | 12   |
| 2204.009 | 11.1 |
| 2204.161 | 9.9  |
| 2204.314 | 9.3  |
| 2204.466 | 9.9  |
| 2204.618 | 10.7 |
| 2204.771 | 10.8 |
| 2204.923 | 10.6 |
| 2205.076 | 11.1 |

|          |      |
|----------|------|
| 2205.228 | 12.1 |
| 2205.38  | 12.7 |
| 2205.533 | 12.2 |
| 2205.685 | 11.4 |
| 2205.838 | 11.7 |
| 2205.99  | 13.2 |
| 2206.142 | 14.5 |
| 2206.295 | 15.5 |
| 2206.447 | 16.1 |
| 2206.6   | 16.3 |
| 2206.752 | 16.1 |
| 2206.904 | 16.1 |
| 2207.057 | 17   |
| 2207.209 | 18.7 |
| 2207.362 | 19.6 |
| 2207.514 | 18.9 |
| 2207.666 | 17.3 |
| 2207.819 | 15.7 |
| 2207.971 | 14.3 |
| 2208.124 | 13.1 |
| 2208.276 | 13   |
| 2208.428 | 13.6 |
| 2208.581 | 14.2 |
| 2208.733 | 14.6 |
| 2208.886 | 14.6 |
| 2209.038 | 14   |
| 2209.19  | 13.6 |
| 2209.343 | 13.8 |
| 2209.495 | 13.8 |
| 2209.648 | 13.4 |
| 2209.8   | 12.9 |
| 2209.952 | 12.9 |
| 2210.105 | 13.3 |
| 2210.257 | 14   |
| 2210.41  | 14.6 |
| 2210.562 | 15.2 |
| 2210.714 | 15.3 |
| 2210.867 | 14.6 |
| 2211.019 | 13.4 |
| 2211.172 | 11.9 |
| 2211.324 | 10.8 |
| 2211.476 | 10.9 |
| 2211.629 | 12.2 |
| 2211.781 | 13   |
| 2211.934 | 13.3 |
| 2212.086 | 13.5 |
| 2212.238 | 13.3 |

|          |      |
|----------|------|
| 2212.391 | 12.7 |
| 2212.543 | 12.8 |
| 2212.696 | 13.1 |
| 2212.848 | 12.8 |
| 2213     | 12.1 |
| 2213.153 | 11.6 |
| 2213.305 | 11.7 |
| 2213.458 | 12.2 |
| 2213.61  | 12.5 |
| 2213.762 | 12.6 |
| 2213.915 | 12.4 |
| 2214.067 | 11.8 |
| 2214.22  | 11.3 |
| 2214.372 | 11.6 |
| 2214.524 | 12.5 |
| 2214.677 | 13   |
| 2214.829 | 12.8 |
| 2214.982 | 12.4 |
| 2215.134 | 12.3 |
| 2215.286 | 11.8 |
| 2215.439 | 11.1 |
| 2215.591 | 10.9 |
| 2215.744 | 10.8 |
| 2215.896 | 10.2 |
| 2216.048 | 9.9  |
| 2216.201 | 10.1 |
| 2216.353 | 10.1 |
| 2216.506 | 9.8  |
| 2216.658 | 9.3  |
| 2216.81  | 8.6  |
| 2216.963 | 8.4  |
| 2217.115 | 8.7  |
| 2217.268 | 9.2  |
| 2217.42  | 9.7  |
| 2217.572 | 10   |
| 2217.725 | 9.8  |
| 2217.877 | 9.9  |
| 2218.03  | 10.8 |
| 2218.182 | 11.7 |
| 2218.334 | 11.6 |
| 2218.487 | 11   |
| 2218.639 | 10.6 |
| 2218.792 | 10.3 |
| 2218.944 | 10.5 |
| 2219.096 | 11.1 |
| 2219.249 | 11.6 |
| 2219.401 | 11.9 |

|          |      |
|----------|------|
| 2219.554 | 12.4 |
| 2219.706 | 13.1 |
| 2219.858 | 13.5 |
| 2220.011 | 13.1 |
| 2220.163 | 12.4 |
| 2220.316 | 11.8 |
| 2220.468 | 11.4 |
| 2220.62  | 11.3 |
| 2220.773 | 11.8 |
| 2220.925 | 13   |
| 2221.078 | 14.1 |
| 2221.23  | 13.7 |
| 2221.382 | 12.1 |
| 2221.535 | 10.9 |
| 2221.687 | 10.5 |
| 2221.84  | 10.1 |
| 2221.992 | 10.1 |
| 2222.144 | 10.6 |
| 2222.297 | 11   |
| 2222.449 | 11   |
| 2222.602 | 10.9 |
| 2222.754 | 11.3 |
| 2222.906 | 12.1 |
| 2223.059 | 12.9 |
| 2223.211 | 13   |
| 2223.364 | 12.6 |
| 2223.516 | 12.4 |
| 2223.668 | 12.2 |
| 2223.821 | 11.8 |
| 2223.973 | 11.3 |
| 2224.126 | 11.8 |
| 2224.278 | 12.8 |
| 2224.43  | 13.6 |
| 2224.583 | 14.6 |
| 2224.735 | 15.6 |
| 2224.888 | 15.7 |
| 2225.04  | 15.2 |
| 2225.192 | 14.8 |
| 2225.345 | 14.1 |
| 2225.497 | 13   |
| 2225.65  | 12.5 |
| 2225.802 | 12.9 |
| 2225.954 | 13.2 |
| 2226.107 | 12.8 |
| 2226.259 | 12   |
| 2226.412 | 11.6 |
| 2226.564 | 11.4 |

|          |      |
|----------|------|
| 2226.716 | 11.1 |
| 2226.869 | 11.1 |
| 2227.021 | 11.1 |
| 2227.174 | 10.7 |
| 2227.326 | 10.9 |
| 2227.478 | 11.8 |
| 2227.631 | 12.3 |
| 2227.783 | 11.8 |
| 2227.936 | 11.3 |
| 2228.088 | 11.1 |
| 2228.24  | 11.3 |
| 2228.393 | 12   |
| 2228.545 | 12.7 |
| 2228.698 | 13   |
| 2228.85  | 12.8 |
| 2229.002 | 12.6 |
| 2229.155 | 12.6 |
| 2229.307 | 12.8 |
| 2229.46  | 12.7 |
| 2229.612 | 11.8 |
| 2229.764 | 11.2 |
| 2229.917 | 11.3 |
| 2230.069 | 11.3 |
| 2230.222 | 10.9 |
| 2230.374 | 11.4 |
| 2230.526 | 12.4 |
| 2230.679 | 12.4 |
| 2230.831 | 11.9 |
| 2230.984 | 11.7 |
| 2231.136 | 10.8 |
| 2231.288 | 9.3  |
| 2231.441 | 8.6  |
| 2231.593 | 9.2  |
| 2231.746 | 10.3 |
| 2231.898 | 11   |
| 2232.05  | 11   |
| 2232.203 | 10.7 |
| 2232.355 | 10.6 |
| 2232.508 | 10.5 |
| 2232.66  | 9.9  |
| 2232.812 | 9.4  |
| 2232.965 | 9.8  |
| 2233.117 | 10.3 |
| 2233.27  | 10.1 |
| 2233.422 | 9.9  |
| 2233.574 | 10.4 |
| 2233.727 | 11.3 |

|          |      |
|----------|------|
| 2233.879 | 12   |
| 2234.032 | 12   |
| 2234.184 | 11.5 |
| 2234.336 | 11.4 |
| 2234.489 | 11.3 |
| 2234.641 | 10.6 |
| 2234.794 | 10   |
| 2234.946 | 10.5 |
| 2235.098 | 11.5 |
| 2235.251 | 13   |
| 2235.403 | 15.9 |
| 2235.556 | 19.7 |
| 2235.708 | 20.9 |
| 2235.86  | 18.3 |
| 2236.013 | 14.8 |
| 2236.165 | 13.3 |
| 2236.318 | 12.6 |
| 2236.47  | 11.4 |
| 2236.622 | 10.2 |
| 2236.775 | 9.9  |
| 2236.927 | 10.3 |
| 2237.08  | 10.4 |
| 2237.232 | 10   |
| 2237.384 | 9.6  |
| 2237.537 | 9.5  |
| 2237.689 | 9.4  |
| 2237.842 | 9.1  |
| 2237.994 | 9    |
| 2238.146 | 9.1  |
| 2238.299 | 9.4  |
| 2238.451 | 9.8  |
| 2238.604 | 10.3 |
| 2238.756 | 10.6 |
| 2238.908 | 10.8 |
| 2239.061 | 11.5 |
| 2239.213 | 12   |
| 2239.366 | 11.6 |
| 2239.518 | 10.9 |
| 2239.67  | 10.9 |
| 2239.823 | 11.6 |
| 2239.975 | 12.1 |
| 2240.128 | 12   |
| 2240.28  | 11.4 |
| 2240.432 | 11   |
| 2240.585 | 10.9 |
| 2240.737 | 10.9 |
| 2240.89  | 11.5 |

|          |      |
|----------|------|
| 2241.042 | 12.9 |
| 2241.194 | 14.7 |
| 2241.347 | 15.9 |
| 2241.499 | 16.6 |
| 2241.652 | 16.7 |
| 2241.804 | 16.4 |
| 2241.956 | 15.7 |
| 2242.109 | 15.8 |
| 2242.261 | 17.1 |
| 2242.414 | 18.1 |
| 2242.566 | 16.8 |
| 2242.718 | 14.1 |
| 2242.871 | 12   |
| 2243.023 | 11.1 |
| 2243.176 | 10.8 |
| 2243.328 | 10.9 |
| 2243.48  | 11.2 |
| 2243.633 | 11.7 |
| 2243.785 | 12.1 |
| 2243.938 | 12.1 |
| 2244.09  | 11.4 |
| 2244.242 | 10.3 |
| 2244.395 | 9.9  |
| 2244.547 | 10.4 |
| 2244.7   | 11.4 |
| 2244.852 | 12   |
| 2245.004 | 12.1 |
| 2245.157 | 12.2 |
| 2245.309 | 12.6 |
| 2245.462 | 12.7 |
| 2245.614 | 12.1 |
| 2245.766 | 11.7 |
| 2245.919 | 12.5 |
| 2246.071 | 13.6 |
| 2246.224 | 13.9 |
| 2246.376 | 13.3 |
| 2246.528 | 13.2 |
| 2246.681 | 15.2 |
| 2246.833 | 19.4 |
| 2246.986 | 23   |
| 2247.138 | 23.6 |
| 2247.29  | 21.9 |
| 2247.443 | 19.4 |
| 2247.595 | 17   |
| 2247.748 | 15.1 |
| 2247.9   | 13.8 |
| 2248.052 | 13.3 |



|          |      |
|----------|------|
| 2248.205 | 13.7 |
| 2248.357 | 14.2 |
| 2248.51  | 14.5 |
| 2248.662 | 15.2 |
| 2248.814 | 15.9 |
| 2248.967 | 16.2 |
| 2249.119 | 16.2 |
| 2249.272 | 16.5 |
| 2249.424 | 17.6 |
| 2249.576 | 20.7 |
| 2249.729 | 26.4 |
| 2249.881 | 30.7 |
| 2250.034 | 29   |
| 2250.186 | 23.3 |
| 2250.338 | 18.9 |
| 2250.491 | 17.3 |
| 2250.643 | 16.6 |
| 2250.796 | 15.2 |
| 2250.948 | 14.3 |
| 2251.1   | 15   |
| 2251.253 | 15.8 |
| 2251.405 | 15.1 |
| 2251.558 | 13.9 |
| 2251.71  | 13.3 |
| 2251.862 | 13.7 |
| 2252.015 | 14   |
| 2252.167 | 14.1 |
| 2252.32  | 14.5 |
| 2252.472 | 15   |
| 2252.624 | 15.2 |
| 2252.777 | 15.7 |
| 2252.929 | 16.7 |
| 2253.082 | 17.2 |
| 2253.234 | 18.1 |
| 2253.386 | 22.2 |
| 2253.539 | 26.2 |
| 2253.691 | 25   |
| 2253.844 | 20.1 |
| 2253.996 | 16.4 |
| 2254.148 | 15.9 |
| 2254.301 | 17.5 |
| 2254.453 | 20   |
| 2254.606 | 23   |
| 2254.758 | 26   |
| 2254.91  | 27.3 |
| 2255.063 | 26.1 |
| 2255.215 | 23.5 |

|          |      |
|----------|------|
| 2255.368 | 21.9 |
| 2255.52  | 23.3 |
| 2255.672 | 27   |
| 2255.825 | 29   |
| 2255.977 | 27.7 |
| 2256.13  | 24.4 |
| 2256.282 | 20.6 |
| 2256.434 | 18.3 |
| 2256.587 | 18.9 |
| 2256.739 | 21.8 |
| 2256.892 | 24.2 |
| 2257.044 | 23.7 |
| 2257.196 | 21.5 |
| 2257.349 | 20.4 |
| 2257.501 | 21.3 |
| 2257.654 | 23.3 |
| 2257.806 | 25.5 |
| 2257.958 | 27.1 |
| 2258.111 | 26.4 |
| 2258.263 | 23.4 |
| 2258.416 | 20.5 |
| 2258.568 | 19   |
| 2258.72  | 17.8 |
| 2258.873 | 16.8 |
| 2259.025 | 16.6 |
| 2259.178 | 17.4 |
| 2259.33  | 18.7 |
| 2259.482 | 20.7 |
| 2259.635 | 24.2 |
| 2259.787 | 27.8 |
| 2259.94  | 30.7 |
| 2260.092 | 32.9 |
| 2260.244 | 32.8 |
| 2260.397 | 30   |
| 2260.549 | 26.4 |
| 2260.702 | 23.6 |
| 2260.854 | 22.2 |
| 2261.006 | 22.8 |
| 2261.159 | 25.6 |
| 2261.311 | 29   |
| 2261.464 | 29.5 |
| 2261.616 | 26.4 |
| 2261.768 | 23.1 |
| 2261.921 | 21.6 |
| 2262.073 | 21.5 |
| 2262.226 | 21   |
| 2262.378 | 19.6 |

|          |      |
|----------|------|
| 2262.53  | 18   |
| 2262.683 | 17.6 |
| 2262.835 | 18.3 |
| 2262.988 | 19.8 |
| 2263.14  | 21.7 |
| 2263.292 | 23   |
| 2263.445 | 23   |
| 2263.597 | 23   |
| 2263.75  | 23.3 |
| 2263.902 | 22.7 |
| 2264.054 | 21.3 |
| 2264.207 | 21   |
| 2264.359 | 22.5 |
| 2264.512 | 23   |
| 2264.664 | 22.2 |
| 2264.816 | 22   |
| 2264.969 | 21.8 |
| 2265.121 | 20.4 |
| 2265.274 | 18.7 |
| 2265.426 | 17.7 |
| 2265.578 | 16.9 |
| 2265.731 | 16.4 |
| 2265.883 | 15.8 |
| 2266.036 | 15.5 |
| 2266.188 | 16   |
| 2266.34  | 16.8 |
| 2266.493 | 16.8 |
| 2266.645 | 16.3 |
| 2266.798 | 15.9 |
| 2266.95  | 16.2 |
| 2267.102 | 17.6 |
| 2267.255 | 20.8 |
| 2267.407 | 24.4 |
| 2267.56  | 26.7 |
| 2267.712 | 27.9 |
| 2267.864 | 29   |
| 2268.017 | 29.9 |
| 2268.169 | 30.6 |
| 2268.322 | 30.9 |
| 2268.474 | 31.3 |
| 2268.626 | 31.4 |
| 2268.779 | 29.5 |
| 2268.931 | 25.8 |
| 2269.084 | 22.6 |
| 2269.236 | 20.4 |
| 2269.388 | 18.6 |
| 2269.541 | 17.4 |

|          |      |
|----------|------|
| 2269.693 | 16.7 |
| 2269.846 | 15.9 |
| 2269.998 | 15.2 |
| 2270.15  | 15.2 |
| 2270.303 | 15.6 |
| 2270.455 | 15.6 |
| 2270.608 | 14.8 |
| 2270.76  | 14   |
| 2270.912 | 14.4 |
| 2271.065 | 16.6 |
| 2271.217 | 20.1 |
| 2271.37  | 23.8 |
| 2271.522 | 25.7 |
| 2271.674 | 25   |
| 2271.827 | 24.2 |
| 2271.979 | 24.1 |
| 2272.132 | 23.5 |
| 2272.284 | 21.2 |
| 2272.436 | 18.4 |
| 2272.589 | 16.6 |
| 2272.741 | 16.5 |
| 2272.894 | 17.6 |
| 2273.046 | 18.9 |
| 2273.198 | 19.8 |
| 2273.351 | 20.6 |
| 2273.503 | 21.4 |
| 2273.656 | 21.3 |
| 2273.808 | 20.4 |
| 2273.96  | 19.8 |
| 2274.113 | 19.6 |
| 2274.265 | 18.9 |
| 2274.418 | 18.1 |
| 2274.57  | 18.2 |
| 2274.722 | 19   |
| 2274.875 | 19.3 |
| 2275.027 | 18.9 |
| 2275.18  | 18.8 |
| 2275.332 | 19.7 |
| 2275.484 | 21.1 |
| 2275.637 | 20.9 |
| 2275.789 | 18.5 |
| 2275.942 | 16.7 |
| 2276.094 | 16.6 |
| 2276.246 | 16.1 |
| 2276.399 | 16.6 |
| 2276.551 | 20.2 |
| 2276.704 | 25.3 |

|          |      |
|----------|------|
| 2276.856 | 30.4 |
| 2277.008 | 34.8 |
| 2277.161 | 36.4 |
| 2277.313 | 34.7 |
| 2277.466 | 33.9 |
| 2277.618 | 35.9 |
| 2277.77  | 37.6 |
| 2277.923 | 36.1 |
| 2278.075 | 31.7 |
| 2278.228 | 26.7 |
| 2278.38  | 22.9 |
| 2278.532 | 20.8 |
| 2278.685 | 20.8 |
| 2278.837 | 22.6 |
| 2278.99  | 23.7 |
| 2279.142 | 22.7 |
| 2279.294 | 21.4 |
| 2279.447 | 21   |
| 2279.599 | 20.3 |
| 2279.752 | 18.5 |
| 2279.904 | 17.4 |
| 2280.056 | 17.9 |
| 2280.209 | 20.3 |
| 2280.361 | 24.4 |
| 2280.514 | 28.6 |
| 2280.666 | 30.2 |
| 2280.818 | 28.7 |
| 2280.971 | 25.8 |
| 2281.123 | 23.5 |
| 2281.276 | 22.8 |
| 2281.428 | 23.2 |
| 2281.58  | 23.2 |
| 2281.733 | 22.2 |
| 2281.885 | 21   |
| 2282.038 | 21.6 |
| 2282.19  | 24.6 |
| 2282.342 | 27.3 |
| 2282.495 | 27.1 |
| 2282.647 | 24.3 |
| 2282.8   | 21.2 |
| 2282.952 | 20.5 |
| 2283.104 | 24.2 |
| 2283.257 | 30.4 |
| 2283.409 | 34.3 |
| 2283.562 | 33.4 |
| 2283.714 | 30.8 |
| 2283.866 | 28.9 |

|          |      |
|----------|------|
| 2284.019 | 27.7 |
| 2284.171 | 26.5 |
| 2284.324 | 25.6 |
| 2284.476 | 24.7 |
| 2284.628 | 24.3 |
| 2284.781 | 24.7 |
| 2284.933 | 25.5 |
| 2285.086 | 26.9 |
| 2285.238 | 28.1 |
| 2285.39  | 28.1 |
| 2285.543 | 27.1 |
| 2285.695 | 25.8 |
| 2285.848 | 24.6 |
| 2286     | 23.9 |
| 2286.152 | 23.6 |
| 2286.305 | 22.8 |
| 2286.457 | 21.6 |
| 2286.61  | 20.8 |
| 2286.762 | 21.1 |
| 2286.914 | 23.9 |
| 2287.067 | 28.2 |
| 2287.219 | 30.3 |
| 2287.372 | 28.6 |
| 2287.524 | 24.9 |
| 2287.676 | 21.8 |
| 2287.829 | 20.8 |
| 2287.981 | 20.7 |
| 2288.134 | 20.6 |
| 2288.286 | 20.3 |
| 2288.438 | 19.7 |
| 2288.591 | 18.3 |
| 2288.743 | 16.9 |
| 2288.896 | 16.2 |
| 2289.048 | 16.6 |
| 2289.2   | 17.6 |
| 2289.353 | 17.7 |
| 2289.505 | 16.9 |
| 2289.658 | 16.4 |
| 2289.81  | 16.7 |
| 2289.962 | 17   |
| 2290.115 | 17.2 |
| 2290.267 | 17.2 |
| 2290.42  | 16.8 |
| 2290.572 | 16.6 |
| 2290.724 | 17.2 |
| 2290.877 | 18.3 |
| 2291.029 | 19.6 |

|          |      |
|----------|------|
| 2291.182 | 21.1 |
| 2291.334 | 23.2 |
| 2291.486 | 26.9 |
| 2291.639 | 30.9 |
| 2291.791 | 31.5 |
| 2291.944 | 28.5 |
| 2292.096 | 26.1 |
| 2292.248 | 25.4 |
| 2292.401 | 24.5 |
| 2292.553 | 22.5 |
| 2292.706 | 20.2 |
| 2292.858 | 18.4 |
| 2293.01  | 17.8 |
| 2293.163 | 18.4 |
| 2293.315 | 18.9 |
| 2293.468 | 18.4 |
| 2293.62  | 17.5 |
| 2293.772 | 17.3 |
| 2293.925 | 17.9 |
| 2294.077 | 18.2 |
| 2294.23  | 17.7 |
| 2294.382 | 17.1 |
| 2294.534 | 17.5 |
| 2294.687 | 18.7 |
| 2294.839 | 20.6 |
| 2294.992 | 22.9 |
| 2295.144 | 24.2 |
| 2295.296 | 23.5 |
| 2295.449 | 21.9 |
| 2295.601 | 20.5 |
| 2295.754 | 19.6 |
| 2295.906 | 18.4 |
| 2296.058 | 16.9 |
| 2296.211 | 16.7 |
| 2296.363 | 17.6 |
| 2296.516 | 18   |
| 2296.668 | 17.9 |
| 2296.82  | 17.8 |
| 2296.973 | 18   |
| 2297.125 | 18.6 |
| 2297.278 | 19.3 |
| 2297.43  | 19.1 |
| 2297.582 | 17.8 |
| 2297.735 | 16.9 |
| 2297.887 | 17.5 |
| 2298.04  | 20.3 |
| 2298.192 | 23.6 |

|          |      |
|----------|------|
| 2298.344 | 24.5 |
| 2298.497 | 22.6 |
| 2298.649 | 20.7 |
| 2298.802 | 20.2 |
| 2298.954 | 19.5 |
| 2299.106 | 18.2 |
| 2299.259 | 17.5 |
| 2299.411 | 17.4 |
| 2299.564 | 16.7 |
| 2299.716 | 15.3 |
| 2299.868 | 14.2 |
| 2300.021 | 13.7 |
| 2300.173 | 13.9 |
| 2300.326 | 14.2 |
| 2300.478 | 14.6 |
| 2300.63  | 15.3 |
| 2300.783 | 16   |
| 2300.935 | 15.9 |
| 2301.088 | 15.1 |
| 2301.24  | 13.9 |
| 2301.392 | 13.4 |
| 2301.545 | 14.5 |
| 2301.697 | 15.9 |
| 2301.85  | 16.4 |
| 2302.002 | 16.5 |
| 2302.154 | 17.3 |
| 2302.307 | 17.8 |
| 2302.459 | 17.5 |
| 2302.612 | 16.7 |
| 2302.764 | 16.5 |
| 2302.916 | 16.6 |
| 2303.069 | 16.7 |
| 2303.221 | 16.6 |
| 2303.374 | 16.2 |
| 2303.526 | 15.8 |
| 2303.678 | 16.2 |
| 2303.831 | 17.4 |
| 2303.983 | 18   |
| 2304.136 | 17.3 |
| 2304.288 | 16.5 |
| 2304.44  | 16.7 |
| 2304.593 | 17.2 |
| 2304.745 | 17.6 |
| 2304.898 | 17.9 |
| 2305.05  | 17.5 |
| 2305.202 | 16.8 |
| 2305.355 | 17   |



|          |      |
|----------|------|
| 2305.507 | 18.2 |
| 2305.66  | 20.7 |
| 2305.812 | 25   |
| 2305.964 | 29.5 |
| 2306.117 | 31.9 |
| 2306.269 | 31.6 |
| 2306.422 | 30.9 |
| 2306.574 | 31.4 |
| 2306.726 | 32.1 |
| 2306.879 | 30.3 |
| 2307.031 | 26.6 |
| 2307.184 | 23.6 |
| 2307.336 | 21.8 |
| 2307.488 | 22   |
| 2307.641 | 23.3 |
| 2307.793 | 22.3 |
| 2307.946 | 20   |
| 2308.098 | 20.2 |
| 2308.25  | 22.2 |
| 2308.403 | 22.9 |
| 2308.555 | 21.5 |
| 2308.708 | 19.9 |
| 2308.86  | 19.4 |
| 2309.012 | 20   |
| 2309.165 | 20.4 |
| 2309.317 | 19.8 |
| 2309.47  | 18.9 |
| 2309.622 | 18.3 |
| 2309.774 | 17.8 |
| 2309.927 | 16.9 |
| 2310.079 | 16   |
| 2310.232 | 16.4 |
| 2310.384 | 18.7 |
| 2310.536 | 21.9 |
| 2310.689 | 24   |
| 2310.841 | 24.1 |
| 2310.994 | 22.9 |
| 2311.146 | 22.6 |
| 2311.298 | 24.4 |
| 2311.451 | 27.8 |
| 2311.603 | 31.5 |
| 2311.756 | 33.3 |
| 2311.908 | 30.9 |
| 2312.06  | 25.7 |
| 2312.213 | 22.3 |
| 2312.365 | 21.6 |
| 2312.518 | 22   |

|          |      |
|----------|------|
| 2312.67  | 22.3 |
| 2312.822 | 22.1 |
| 2312.975 | 20.2 |
| 2313.127 | 18.3 |
| 2313.28  | 18.8 |
| 2313.432 | 21   |
| 2313.584 | 22.5 |
| 2313.737 | 22.6 |
| 2313.889 | 22.2 |
| 2314.042 | 21.2 |
| 2314.194 | 20.3 |
| 2314.346 | 19.6 |
| 2314.499 | 18.5 |
| 2314.651 | 16.6 |
| 2314.804 | 15.6 |
| 2314.956 | 16.4 |
| 2315.108 | 18.4 |
| 2315.261 | 21   |
| 2315.413 | 22.3 |
| 2315.566 | 21.5 |
| 2315.718 | 21.1 |
| 2315.87  | 23.6 |
| 2316.023 | 28   |
| 2316.175 | 31   |
| 2316.328 | 30.6 |
| 2316.48  | 27.3 |
| 2316.632 | 24   |
| 2316.785 | 22.8 |
| 2316.937 | 23.1 |
| 2317.09  | 23.4 |
| 2317.242 | 23.5 |
| 2317.394 | 23.6 |
| 2317.547 | 24   |
| 2317.699 | 24.8 |
| 2317.852 | 26.5 |
| 2318.004 | 29   |
| 2318.156 | 32.2 |
| 2318.309 | 36.2 |
| 2318.461 | 39.5 |
| 2318.614 | 40.1 |
| 2318.766 | 38.7 |
| 2318.918 | 38.4 |
| 2319.071 | 41   |
| 2319.223 | 43.4 |
| 2319.376 | 41.4 |
| 2319.528 | 35.2 |
| 2319.68  | 29   |

|          |      |
|----------|------|
| 2319.833 | 26.6 |
| 2319.985 | 28.9 |
| 2320.138 | 32.3 |
| 2320.29  | 31.8 |
| 2320.442 | 28.3 |
| 2320.595 | 25.2 |
| 2320.747 | 23.7 |
| 2320.9   | 23.6 |
| 2321.052 | 24.3 |
| 2321.204 | 24.5 |
| 2321.357 | 25.3 |
| 2321.509 | 28.4 |
| 2321.662 | 31.5 |
| 2321.814 | 31   |
| 2321.966 | 27.2 |
| 2322.119 | 24.5 |
| 2322.271 | 24   |
| 2322.424 | 23.1 |
| 2322.576 | 21.7 |
| 2322.728 | 22.3 |
| 2322.881 | 26   |
| 2323.033 | 31.3 |
| 2323.186 | 34.2 |
| 2323.338 | 32   |
| 2323.49  | 28.2 |
| 2323.643 | 26.3 |
| 2323.795 | 25.9 |
| 2323.948 | 27.7 |
| 2324.1   | 32.8 |
| 2324.252 | 37.9 |
| 2324.405 | 38.2 |
| 2324.557 | 34   |
| 2324.71  | 31.7 |
| 2324.862 | 33.9 |
| 2325.014 | 35.6 |
| 2325.167 | 33.3 |
| 2325.319 | 31.1 |
| 2325.472 | 32.8 |
| 2325.624 | 35.7 |
| 2325.776 | 36.8 |
| 2325.929 | 36   |
| 2326.081 | 33.7 |
| 2326.234 | 30.7 |
| 2326.386 | 29.5 |
| 2326.538 | 31.6 |
| 2326.691 | 36.2 |
| 2326.843 | 41.9 |

|          |      |
|----------|------|
| 2326.996 | 46.5 |
| 2327.148 | 47.7 |
| 2327.3   | 46.5 |
| 2327.453 | 45.7 |
| 2327.605 | 45.2 |
| 2327.758 | 43   |
| 2327.91  | 39.5 |
| 2328.062 | 36.1 |
| 2328.215 | 33.4 |
| 2328.367 | 31.5 |
| 2328.52  | 30.7 |
| 2328.672 | 30.4 |
| 2328.824 | 29.7 |
| 2328.977 | 28.3 |
| 2329.129 | 26.3 |
| 2329.282 | 25.2 |
| 2329.434 | 26.5 |
| 2329.586 | 27.9 |
| 2329.739 | 27.2 |
| 2329.891 | 24.7 |
| 2330.044 | 23   |
| 2330.196 | 22.3 |
| 2330.348 | 21.9 |
| 2330.501 | 22.7 |
| 2330.653 | 26.1 |
| 2330.806 | 30.4 |
| 2330.958 | 33   |
| 2331.11  | 32.3 |
| 2331.263 | 29   |
| 2331.415 | 27   |
| 2331.568 | 27.9 |
| 2331.72  | 29.5 |
| 2331.872 | 28.9 |
| 2332.025 | 27   |
| 2332.177 | 25.6 |
| 2332.33  | 25.3 |
| 2332.482 | 24.8 |
| 2332.634 | 23.4 |
| 2332.787 | 22.1 |
| 2332.939 | 22.3 |
| 2333.092 | 24.9 |
| 2333.244 | 29.2 |
| 2333.396 | 32.6 |
| 2333.549 | 32.4 |
| 2333.701 | 29.4 |
| 2333.854 | 26.2 |
| 2334.006 | 24.7 |

|          |      |
|----------|------|
| 2334.158 | 24.9 |
| 2334.311 | 26.7 |
| 2334.463 | 29   |
| 2334.616 | 29.9 |
| 2334.768 | 28.3 |
| 2334.92  | 25.8 |
| 2335.073 | 23.7 |
| 2335.225 | 22.3 |
| 2335.378 | 22.2 |
| 2335.53  | 23.1 |
| 2335.682 | 23.6 |
| 2335.835 | 23.8 |
| 2335.987 | 24.8 |
| 2336.14  | 26.2 |
| 2336.292 | 27.3 |
| 2336.444 | 27.7 |
| 2336.597 | 27.1 |
| 2336.749 | 25.9 |
| 2336.902 | 25   |
| 2337.054 | 24.9 |
| 2337.206 | 25.5 |
| 2337.359 | 25.8 |
| 2337.511 | 25.7 |
| 2337.664 | 27.5 |
| 2337.816 | 31.7 |
| 2337.968 | 34.1 |
| 2338.121 | 33.1 |
| 2338.273 | 31.9 |
| 2338.426 | 32.9 |
| 2338.578 | 33.5 |
| 2338.73  | 31.9 |
| 2338.883 | 30.1 |
| 2339.035 | 29.9 |
| 2339.188 | 31   |
| 2339.34  | 31.6 |
| 2339.492 | 30.8 |
| 2339.645 | 28.6 |
| 2339.797 | 27.1 |
| 2339.95  | 27   |
| 2340.102 | 26.3 |
| 2340.254 | 24.2 |
| 2340.407 | 23.2 |
| 2340.559 | 25.4 |
| 2340.712 | 29.5 |
| 2340.864 | 32.4 |
| 2341.016 | 31.5 |
| 2341.169 | 28.7 |

|          |      |
|----------|------|
| 2341.321 | 27.7 |
| 2341.474 | 29.5 |
| 2341.626 | 31.4 |
| 2341.778 | 30.9 |
| 2341.931 | 28.6 |
| 2342.083 | 27.2 |
| 2342.236 | 27.4 |
| 2342.388 | 27.5 |
| 2342.54  | 27.7 |
| 2342.693 | 29.2 |
| 2342.845 | 30   |
| 2342.998 | 28.5 |
| 2343.15  | 25.8 |
| 2343.302 | 24.2 |
| 2343.455 | 24.2 |
| 2343.607 | 25.3 |
| 2343.76  | 25.8 |
| 2343.912 | 24.7 |
| 2344.064 | 23.4 |
| 2344.217 | 23.3 |
| 2344.369 | 24.6 |
| 2344.522 | 26.3 |
| 2344.674 | 27.8 |
| 2344.826 | 28.7 |
| 2344.979 | 28.3 |
| 2345.131 | 26.4 |
| 2345.284 | 23.9 |
| 2345.436 | 22   |
| 2345.588 | 21.8 |
| 2345.741 | 25   |
| 2345.893 | 30.9 |
| 2346.046 | 35.5 |
| 2346.198 | 35.2 |
| 2346.35  | 31.6 |
| 2346.503 | 28.4 |
| 2346.655 | 27.3 |
| 2346.808 | 26.8 |
| 2346.96  | 25.7 |
| 2347.112 | 24.9 |
| 2347.265 | 25   |
| 2347.417 | 24.9 |
| 2347.57  | 24.6 |
| 2347.722 | 25.7 |
| 2347.874 | 29.2 |
| 2348.027 | 33.1 |
| 2348.179 | 33.4 |
| 2348.332 | 30   |

|          |      |
|----------|------|
| 2348.484 | 26.6 |
| 2348.636 | 24.5 |
| 2348.789 | 22.6 |
| 2348.941 | 22.5 |
| 2349.094 | 25.4 |
| 2349.246 | 28.2 |
| 2349.398 | 27.4 |
| 2349.551 | 25.9 |
| 2349.703 | 26.5 |
| 2349.856 | 26.9 |
| 2350.008 | 25.8 |
| 2350.16  | 24.8 |
| 2350.313 | 24   |
| 2350.465 | 22.8 |
| 2350.618 | 21.6 |
| 2350.77  | 21.2 |
| 2350.922 | 22.6 |
| 2351.075 | 25.3 |
| 2351.227 | 26.8 |
| 2351.38  | 26.7 |
| 2351.532 | 26.9 |
| 2351.684 | 26.9 |
| 2351.837 | 26   |
| 2351.989 | 24.8 |
| 2352.142 | 24.6 |
| 2352.294 | 26   |
| 2352.446 | 29   |
| 2352.599 | 31.5 |
| 2352.751 | 32   |
| 2352.904 | 30.8 |
| 2353.056 | 30   |
| 2353.208 | 30.8 |
| 2353.361 | 32.6 |
| 2353.513 | 33.5 |
| 2353.666 | 32.7 |
| 2353.818 | 30.4 |
| 2353.97  | 27.8 |
| 2354.123 | 26.1 |
| 2354.275 | 24.2 |
| 2354.428 | 21.8 |
| 2354.58  | 20.6 |
| 2354.732 | 21.7 |
| 2354.885 | 25.3 |
| 2355.037 | 29.8 |
| 2355.19  | 32   |
| 2355.342 | 30.9 |
| 2355.494 | 29.7 |

|          |      |
|----------|------|
| 2355.647 | 31   |
| 2355.799 | 33.1 |
| 2355.952 | 33.3 |
| 2356.104 | 31.6 |
| 2356.256 | 29.7 |
| 2356.409 | 28.6 |
| 2356.561 | 28   |
| 2356.714 | 27.4 |
| 2356.866 | 26.1 |
| 2357.018 | 24.1 |
| 2357.171 | 23.9 |
| 2357.323 | 26.1 |
| 2357.476 | 28.3 |
| 2357.628 | 28.3 |
| 2357.78  | 26.4 |
| 2357.933 | 24.4 |
| 2358.085 | 23.2 |
| 2358.238 | 22.9 |
| 2358.39  | 23.6 |
| 2358.542 | 25.8 |
| 2358.695 | 29   |
| 2358.847 | 31.7 |
| 2359     | 33.1 |
| 2359.152 | 32.5 |
| 2359.304 | 30.2 |
| 2359.457 | 27.7 |
| 2359.609 | 26.6 |
| 2359.762 | 27   |
| 2359.914 | 27.6 |
| 2360.066 | 27   |
| 2360.219 | 25.4 |
| 2360.371 | 24.1 |
| 2360.524 | 23.2 |
| 2360.676 | 22.3 |
| 2360.828 | 21.9 |
| 2360.981 | 23   |
| 2361.133 | 24.7 |
| 2361.286 | 25.8 |
| 2361.438 | 26   |
| 2361.59  | 25.7 |
| 2361.743 | 25   |
| 2361.895 | 24   |
| 2362.048 | 23.8 |
| 2362.2   | 24.3 |
| 2362.352 | 25.3 |
| 2362.505 | 25.2 |
| 2362.657 | 23.9 |



|          |      |
|----------|------|
| 2362.81  | 23.3 |
| 2362.962 | 24.9 |
| 2363.114 | 27   |
| 2363.267 | 28.1 |
| 2363.419 | 28.3 |
| 2363.572 | 27.9 |
| 2363.724 | 27.4 |
| 2363.876 | 26.7 |
| 2364.029 | 26.3 |
| 2364.181 | 26.8 |
| 2364.334 | 27.1 |
| 2364.486 | 27   |
| 2364.638 | 27.7 |
| 2364.791 | 28.3 |
| 2364.943 | 26.9 |
| 2365.096 | 25   |
| 2365.248 | 24.4 |
| 2365.4   | 24.3 |
| 2365.553 | 24.1 |
| 2365.705 | 24.1 |
| 2365.858 | 23.9 |
| 2366.01  | 23.3 |
| 2366.162 | 23.4 |
| 2366.315 | 24.6 |
| 2366.467 | 25.9 |
| 2366.62  | 26.1 |
| 2366.772 | 24.7 |
| 2366.924 | 23.4 |
| 2367.077 | 24.6 |
| 2367.229 | 27   |
| 2367.382 | 27.9 |
| 2367.534 | 27.6 |
| 2367.686 | 27.7 |
| 2367.839 | 28.2 |
| 2367.991 | 29.5 |
| 2368.144 | 30.9 |
| 2368.296 | 31.6 |
| 2368.448 | 31.1 |
| 2368.601 | 30.5 |
| 2368.753 | 30.6 |
| 2368.906 | 29.9 |
| 2369.058 | 27.8 |
| 2369.21  | 26.7 |
| 2369.363 | 27.5 |
| 2369.515 | 27.9 |
| 2369.668 | 26.4 |
| 2369.82  | 24.2 |

|          |      |
|----------|------|
| 2369.972 | 23.3 |
| 2370.125 | 23.8 |
| 2370.277 | 24.7 |
| 2370.43  | 25.2 |
| 2370.582 | 25.3 |
| 2370.734 | 25.8 |
| 2370.887 | 26.4 |
| 2371.039 | 26.5 |
| 2371.192 | 25.9 |
| 2371.344 | 24.5 |
| 2371.496 | 22.8 |
| 2371.649 | 22.4 |
| 2371.801 | 23.8 |
| 2371.954 | 26   |
| 2372.106 | 28.5 |
| 2372.258 | 30.5 |
| 2372.411 | 32.7 |
| 2372.563 | 36.3 |
| 2372.716 | 39   |
| 2372.868 | 37.8 |
| 2373.02  | 33.6 |
| 2373.173 | 29.8 |
| 2373.325 | 27.7 |
| 2373.478 | 27.1 |
| 2373.63  | 28.5 |
| 2373.782 | 30.2 |
| 2373.935 | 30.8 |
| 2374.087 | 30.2 |
| 2374.24  | 29.6 |
| 2374.392 | 30   |
| 2374.544 | 31.5 |
| 2374.697 | 32.7 |
| 2374.849 | 33.3 |
| 2375.002 | 33.6 |
| 2375.154 | 33.5 |
| 2375.306 | 33.6 |
| 2375.459 | 33.2 |
| 2375.611 | 30   |
| 2375.764 | 25.7 |
| 2375.916 | 24.3 |
| 2376.068 | 25.9 |
| 2376.221 | 27.9 |
| 2376.373 | 28.7 |
| 2376.526 | 29.2 |
| 2376.678 | 30.2 |
| 2376.83  | 30.7 |
| 2376.983 | 29.8 |

|          |      |
|----------|------|
| 2377.135 | 28.7 |
| 2377.288 | 28   |
| 2377.44  | 26.9 |
| 2377.592 | 26.2 |
| 2377.745 | 27.3 |
| 2377.897 | 28.2 |
| 2378.05  | 27.4 |
| 2378.202 | 26.4 |
| 2378.354 | 26.7 |
| 2378.507 | 27.4 |
| 2378.659 | 28   |
| 2378.812 | 29.6 |
| 2378.964 | 31.6 |
| 2379.116 | 31.7 |
| 2379.269 | 29.8 |
| 2379.421 | 29.5 |
| 2379.574 | 32.5 |
| 2379.726 | 35.8 |
| 2379.878 | 36.3 |
| 2380.031 | 33.5 |
| 2380.183 | 30.7 |
| 2380.336 | 30.7 |
| 2380.488 | 32.4 |
| 2380.64  | 32.9 |
| 2380.793 | 31.9 |
| 2380.945 | 31.5 |
| 2381.098 | 32.9 |
| 2381.25  | 34.4 |
| 2381.402 | 34.9 |
| 2381.555 | 34.1 |
| 2381.707 | 32.1 |
| 2381.86  | 29.2 |
| 2382.012 | 28.1 |
| 2382.164 | 29.9 |
| 2382.317 | 31.8 |
| 2382.469 | 31.8 |
| 2382.622 | 31   |
| 2382.774 | 31.4 |
| 2382.926 | 32.8 |
| 2383.079 | 32.6 |
| 2383.231 | 30.4 |
| 2383.384 | 28.8 |
| 2383.536 | 28.4 |
| 2383.688 | 28.2 |
| 2383.841 | 27.4 |
| 2383.993 | 26.5 |
| 2384.146 | 26.5 |

|          |      |
|----------|------|
| 2384.298 | 26.7 |
| 2384.45  | 26.1 |
| 2384.603 | 25.5 |
| 2384.755 | 25.6 |
| 2384.908 | 28.1 |
| 2385.06  | 34.3 |
| 2385.212 | 40   |
| 2385.365 | 40.4 |
| 2385.517 | 37.4 |
| 2385.67  | 35.5 |
| 2385.822 | 34.3 |
| 2385.974 | 31.1 |
| 2386.127 | 27.1 |
| 2386.279 | 26.4 |
| 2386.432 | 29.8 |
| 2386.584 | 33.1 |
| 2386.736 | 33.2 |
| 2386.889 | 30.8 |
| 2387.041 | 29.2 |
| 2387.194 | 28.6 |
| 2387.346 | 29.5 |
| 2387.498 | 32.2 |
| 2387.651 | 34.6 |
| 2387.803 | 33.6 |
| 2387.956 | 30.2 |
| 2388.108 | 27.7 |
| 2388.26  | 27.8 |
| 2388.413 | 30.3 |
| 2388.565 | 33.2 |
| 2388.718 | 35.5 |
| 2388.87  | 37.5 |
| 2389.022 | 38.5 |
| 2389.175 | 37.3 |
| 2389.327 | 35.4 |
| 2389.48  | 35.7 |
| 2389.632 | 39.2 |
| 2389.784 | 43   |
| 2389.937 | 43   |
| 2390.089 | 38.8 |
| 2390.242 | 33.7 |
| 2390.394 | 30   |
| 2390.546 | 27.9 |
| 2390.699 | 28.2 |
| 2390.851 | 31   |
| 2391.004 | 33.1 |
| 2391.156 | 32.7 |
| 2391.308 | 32.3 |

|          |      |
|----------|------|
| 2391.461 | 33.9 |
| 2391.613 | 35.2 |
| 2391.766 | 34.2 |
| 2391.918 | 32.6 |
| 2392.07  | 33.5 |
| 2392.223 | 35.4 |
| 2392.375 | 35.9 |
| 2392.528 | 36.6 |
| 2392.68  | 40.2 |
| 2392.832 | 45.5 |
| 2392.985 | 47.8 |
| 2393.137 | 46.1 |
| 2393.29  | 44.9 |
| 2393.442 | 47.1 |
| 2393.594 | 49.6 |
| 2393.747 | 49.7 |
| 2393.899 | 49.7 |
| 2394.052 | 51.1 |
| 2394.204 | 52.3 |
| 2394.356 | 53   |
| 2394.509 | 54.7 |
| 2394.661 | 57.7 |
| 2394.814 | 59.3 |
| 2394.966 | 58.4 |
| 2395.118 | 58.3 |
| 2395.271 | 60.1 |
| 2395.423 | 59.8 |
| 2395.576 | 57   |
| 2395.728 | 55.6 |
| 2395.88  | 56.2 |
| 2396.033 | 55.7 |
| 2396.185 | 53   |
| 2396.338 | 49.7 |
| 2396.49  | 47.6 |
| 2396.642 | 47.9 |
| 2396.795 | 51.1 |
| 2396.947 | 55.7 |
| 2397.1   | 58   |
| 2397.252 | 56.1 |
| 2397.404 | 52.4 |
| 2397.557 | 49.8 |
| 2397.709 | 49   |
| 2397.862 | 48.2 |
| 2398.014 | 46.9 |
| 2398.166 | 45.8 |
| 2398.319 | 46   |
| 2398.471 | 46.7 |

|          |      |
|----------|------|
| 2398.624 | 46.7 |
| 2398.776 | 47.3 |
| 2398.928 | 49.6 |
| 2399.081 | 51   |
| 2399.233 | 49.3 |
| 2399.386 | 46.5 |
| 2399.538 | 45.7 |
| 2399.69  | 46.6 |
| 2399.843 | 46.7 |
| 2399.995 | 45.6 |
| 2400.148 | 44.8 |
| 2400.3   | 44.5 |
| 2400.452 | 43.2 |
| 2400.605 | 40.6 |
| 2400.757 | 38   |
| 2400.91  | 37.4 |
| 2401.062 | 40.1 |
| 2401.214 | 45.2 |
| 2401.367 | 49.1 |
| 2401.519 | 49.8 |
| 2401.672 | 49.2 |
| 2401.824 | 48.9 |
| 2401.976 | 47.7 |
| 2402.129 | 44.6 |
| 2402.281 | 40.5 |
| 2402.434 | 36.6 |
| 2402.586 | 33.3 |
| 2402.738 | 31.3 |
| 2402.891 | 31.4 |
| 2403.043 | 33.6 |
| 2403.196 | 36.9 |
| 2403.348 | 39.7 |
| 2403.5   | 40.3 |
| 2403.653 | 39.2 |
| 2403.805 | 38.5 |
| 2403.958 | 39   |
| 2404.11  | 40.3 |
| 2404.262 | 41.6 |
| 2404.415 | 42.4 |
| 2404.567 | 42.9 |
| 2404.72  | 42.8 |
| 2404.872 | 41.6 |
| 2405.024 | 39.5 |
| 2405.177 | 37.7 |
| 2405.329 | 36.9 |
| 2405.482 | 37.1 |
| 2405.634 | 37.9 |

|          |      |
|----------|------|
| 2405.786 | 37.6 |
| 2405.939 | 36.9 |
| 2406.091 | 36.9 |
| 2406.244 | 37.1 |
| 2406.396 | 36.4 |
| 2406.548 | 35.8 |
| 2406.701 | 36.6 |
| 2406.853 | 38.8 |
| 2407.006 | 40.8 |
| 2407.158 | 41.8 |
| 2407.31  | 41.7 |
| 2407.463 | 40.6 |
| 2407.615 | 39.3 |
| 2407.768 | 38.8 |
| 2407.92  | 39   |
| 2408.072 | 39.7 |
| 2408.225 | 40.5 |
| 2408.377 | 41.1 |
| 2408.53  | 41   |
| 2408.682 | 41.8 |
| 2408.834 | 43.6 |
| 2408.987 | 44.1 |
| 2409.139 | 44.3 |
| 2409.292 | 48   |
| 2409.444 | 55   |
| 2409.596 | 61   |
| 2409.749 | 61.3 |
| 2409.901 | 54.7 |
| 2410.054 | 44.8 |
| 2410.206 | 37   |
| 2410.358 | 32.6 |
| 2410.511 | 30.6 |
| 2410.663 | 31   |
| 2410.816 | 32.5 |
| 2410.968 | 33.2 |
| 2411.12  | 33.4 |
| 2411.273 | 34.4 |
| 2411.425 | 35.4 |
| 2411.578 | 37.2 |
| 2411.73  | 41.1 |
| 2411.882 | 46   |
| 2412.035 | 50.2 |
| 2412.187 | 54.4 |
| 2412.34  | 55.6 |
| 2412.492 | 51.8 |
| 2412.644 | 46.4 |
| 2412.797 | 41.9 |

|          |      |
|----------|------|
| 2412.949 | 37   |
| 2413.102 | 34.7 |
| 2413.254 | 36.6 |
| 2413.406 | 38.5 |
| 2413.559 | 38   |
| 2413.711 | 36.5 |
| 2413.864 | 34.9 |
| 2414.016 | 33.3 |
| 2414.168 | 31.7 |
| 2414.321 | 29   |
| 2414.473 | 25.1 |
| 2414.626 | 21.5 |
| 2414.778 | 18.8 |
| 2414.93  | 17.3 |
| 2415.083 | 17   |
| 2415.235 | 18   |
| 2415.388 | 20   |
| 2415.54  | 21.4 |
| 2415.692 | 20.6 |
| 2415.845 | 18.5 |
| 2415.997 | 17.1 |
| 2416.15  | 16.6 |
| 2416.302 | 16.3 |
| 2416.454 | 16.4 |
| 2416.607 | 17.1 |
| 2416.759 | 18.1 |
| 2416.912 | 19.1 |
| 2417.064 | 19.6 |
| 2417.216 | 19.9 |
| 2417.369 | 20.2 |
| 2417.521 | 20.5 |
| 2417.674 | 20.6 |
| 2417.826 | 21.1 |
| 2417.978 | 23.8 |
| 2418.131 | 28.7 |
| 2418.283 | 33   |
| 2418.436 | 35   |
| 2418.588 | 37.1 |
| 2418.74  | 44.1 |
| 2418.893 | 55.2 |
| 2419.045 | 62.8 |
| 2419.198 | 60.8 |
| 2419.35  | 52.3 |
| 2419.502 | 44.5 |
| 2419.655 | 40.7 |
| 2419.807 | 38.9 |
| 2419.96  | 37   |



|          |      |
|----------|------|
| 2420.112 | 35.1 |
| 2420.264 | 33.9 |
| 2420.417 | 34.4 |
| 2420.569 | 37.2 |
| 2420.722 | 41   |
| 2420.874 | 43.1 |
| 2421.026 | 41.6 |
| 2421.179 | 38   |
| 2421.331 | 35.9 |
| 2421.484 | 36.1 |
| 2421.636 | 36.7 |
| 2421.788 | 35.8 |
| 2421.941 | 33.4 |
| 2422.093 | 31.4 |
| 2422.246 | 30.9 |
| 2422.398 | 31.4 |
| 2422.55  | 31.9 |
| 2422.703 | 32.3 |
| 2422.855 | 32.7 |
| 2423.008 | 32.9 |
| 2423.16  | 33.2 |
