# Supplementary material for: Milankovitch forcing recorded in gamma ray logs and cyclicity in subsurface Upper Jurassic (Kimmeridgian) Jubaila–lower Arab platform carbonates, Saudi Arabia
Source: Springer Nature journal article supplement (doi:10.1007/s12517-022-10664-8), 2022-08-24
Supplement: 12517_2022_10664_MOESM2_ESM.pdf [file 12517_2022_10664_MOESM2_ESM.pdf]

|          |          |
|----------|----------|
| 2103.12  | 10.78247 |
| 2103.196 | 10.51847 |
| 2103.272 | 10.25446 |
| 2103.349 | 10.1173  |
| 2103.425 | 9.980146 |
| 2103.501 | 10.0683  |
| 2103.577 | 10.15645 |
| 2103.653 | 10.5211  |
| 2103.73  | 10.88575 |
| 2103.806 | 11.46367 |
| 2103.882 | 12.0416  |
| 2103.958 | 12.69368 |
| 2104.034 | 13.34577 |
| 2104.111 | 13.92535 |
| 2104.187 | 14.50493 |
| 2104.263 | 14.91031 |
| 2104.339 | 15.31569 |
| 2104.415 | 15.49256 |
| 2104.492 | 15.66943 |
| 2104.568 | 15.64506 |
| 2104.644 | 15.62069 |
| 2104.72  | 15.47048 |
| 2104.796 | 15.32027 |
| 2104.873 | 15.14449 |
| 2104.949 | 14.96871 |
| 2105.025 | 14.83592 |
| 2105.101 | 14.70312 |
| 2105.177 | 14.63246 |
| 2105.254 | 14.56179 |
| 2105.33  | 14.53682 |
| 2105.406 | 14.51185 |
| 2105.482 | 14.52253 |
| 2105.558 | 14.53321 |
| 2105.635 | 14.54559 |
| 2105.711 | 14.55796 |
| 2105.787 | 14.52945 |
| 2105.863 | 14.50094 |
| 2105.939 | 14.41539 |
| 2106.016 | 14.32983 |
| 2106.092 | 14.21666 |
| 2106.168 | 14.1035  |
| 2106.244 | 14.01365 |
| 2106.32  | 13.92381 |
| 2106.397 | 13.89805 |
| 2106.473 | 13.87229 |
| 2106.549 | 13.90045 |
| 2106.625 | 13.92862 |

|          |          |
|----------|----------|
| 2106.701 | 13.96615 |
| 2106.778 | 14.00369 |
| 2106.854 | 14.01798 |
| 2106.93  | 14.03227 |
| 2107.006 | 14.00989 |
| 2107.082 | 13.98751 |
| 2107.159 | 13.96732 |
| 2107.235 | 13.94712 |
| 2107.311 | 13.99049 |
| 2107.387 | 14.03385 |
| 2107.463 | 14.17729 |
| 2107.54  | 14.32072 |
| 2107.616 | 14.53272 |
| 2107.692 | 14.74472 |
| 2107.768 | 14.95656 |
| 2107.844 | 15.16841 |
| 2107.921 | 15.3393  |
| 2107.997 | 15.51019 |
| 2108.073 | 15.62753 |
| 2108.149 | 15.74487 |
| 2108.225 | 15.78932 |
| 2108.302 | 15.83377 |
| 2108.378 | 15.77454 |
| 2108.454 | 15.71531 |
| 2108.53  | 15.53163 |
| 2108.606 | 15.34795 |
| 2108.683 | 15.03866 |
| 2108.759 | 14.72937 |
| 2108.835 | 14.32648 |
| 2108.911 | 13.92358 |
| 2108.987 | 13.50624 |
| 2109.064 | 13.08891 |
| 2109.14  | 12.7548  |
| 2109.216 | 12.42068 |
| 2109.292 | 12.26025 |
| 2109.368 | 12.09981 |
| 2109.445 | 12.16164 |
| 2109.521 | 12.22347 |
| 2109.597 | 12.46924 |
| 2109.673 | 12.71501 |
| 2109.749 | 13.06119 |
| 2109.826 | 13.40737 |
| 2109.902 | 13.81181 |
| 2109.978 | 14.21625 |
| 2110.054 | 14.68443 |
| 2110.13  | 15.15262 |
| 2110.207 | 15.66713 |

|          |          |
|----------|----------|
| 2110.283 | 16.18164 |
| 2110.359 | 16.69436 |
| 2110.435 | 17.20708 |
| 2110.511 | 17.66833 |
| 2110.588 | 18.12959 |
| 2110.664 | 18.48466 |
| 2110.74  | 18.83972 |
| 2110.816 | 19.029   |
| 2110.892 | 19.21828 |
| 2110.969 | 19.20448 |
| 2111.045 | 19.19067 |
| 2111.121 | 18.98838 |
| 2111.197 | 18.78609 |
| 2111.273 | 18.45713 |
| 2111.35  | 18.12817 |
| 2111.426 | 17.75954 |
| 2111.502 | 17.3909  |
| 2111.578 | 17.061   |
| 2111.654 | 16.73111 |
| 2111.731 | 16.48473 |
| 2111.807 | 16.23836 |
| 2111.883 | 16.11568 |
| 2111.959 | 15.99301 |
| 2112.035 | 15.99447 |
| 2112.112 | 15.99594 |
| 2112.188 | 16.05239 |
| 2112.264 | 16.10884 |
| 2112.34  | 16.14114 |
| 2112.416 | 16.17345 |
| 2112.493 | 16.16333 |
| 2112.569 | 16.15321 |
| 2112.645 | 16.1053  |
| 2112.721 | 16.05739 |
| 2112.797 | 15.9903  |
| 2112.874 | 15.92321 |
| 2112.95  | 15.87089 |
| 2113.026 | 15.81858 |
| 2113.102 | 15.82723 |
| 2113.178 | 15.83588 |
| 2113.255 | 15.93291 |
| 2113.331 | 16.02994 |
| 2113.407 | 16.21896 |
| 2113.483 | 16.40797 |
| 2113.559 | 16.6399  |
| 2113.636 | 16.87183 |
| 2113.712 | 17.06641 |
| 2113.788 | 17.261   |

|          |          |
|----------|----------|
| 2113.864 | 17.36288 |
| 2113.94  | 17.46477 |
| 2114.017 | 17.44972 |
| 2114.093 | 17.43468 |
| 2114.169 | 17.31046 |
| 2114.245 | 17.18623 |
| 2114.321 | 17.00278 |
| 2114.398 | 16.81934 |
| 2114.474 | 16.62035 |
| 2114.55  | 16.42137 |
| 2114.626 | 16.21757 |
| 2114.702 | 16.01376 |
| 2114.779 | 15.76928 |
| 2114.855 | 15.52479 |
| 2114.931 | 15.2032  |
| 2115.007 | 14.88161 |
| 2115.083 | 14.51373 |
| 2115.16  | 14.14585 |
| 2115.236 | 13.82531 |
| 2115.312 | 13.50478 |
| 2115.388 | 13.3311  |
| 2115.464 | 13.15743 |
| 2115.541 | 13.15954 |
| 2115.617 | 13.16164 |
| 2115.693 | 13.27473 |
| 2115.769 | 13.38782 |
| 2115.845 | 13.50918 |
| 2115.922 | 13.63054 |
| 2115.998 | 13.67164 |
| 2116.074 | 13.71275 |
| 2116.15  | 13.64141 |
| 2116.226 | 13.57006 |
| 2116.303 | 13.41358 |
| 2116.379 | 13.25709 |
| 2116.455 | 13.09034 |
| 2116.531 | 12.92358 |
| 2116.607 | 12.80786 |
| 2116.684 | 12.69214 |
| 2116.76  | 12.64652 |
| 2116.836 | 12.6009  |
| 2116.912 | 12.63201 |
| 2116.988 | 12.66311 |
| 2117.065 | 12.76627 |
| 2117.141 | 12.86942 |
| 2117.217 | 13.01324 |
| 2117.293 | 13.15706 |
| 2117.369 | 13.33231 |

|          |          |
|----------|----------|
| 2117.446 | 13.50756 |
| 2117.522 | 13.70384 |
| 2117.598 | 13.90012 |
| 2117.674 | 14.09075 |
| 2117.75  | 14.28139 |
| 2117.827 | 14.44822 |
| 2117.903 | 14.61505 |
| 2117.979 | 14.75446 |
| 2118.055 | 14.89388 |
| 2118.131 | 15.01159 |
| 2118.208 | 15.1293  |
| 2118.284 | 15.25066 |
| 2118.36  | 15.37202 |
| 2118.436 | 15.51441 |
| 2118.512 | 15.65679 |
| 2118.589 | 15.81343 |
| 2118.665 | 15.97006 |
| 2118.741 | 16.11971 |
| 2118.817 | 16.26935 |
| 2118.893 | 16.4135  |
| 2118.97  | 16.55765 |
| 2119.046 | 16.69376 |
| 2119.122 | 16.82986 |
| 2119.198 | 16.95197 |
| 2119.274 | 17.07408 |
| 2119.351 | 17.16927 |
| 2119.427 | 17.26447 |
| 2119.503 | 17.29971 |
| 2119.579 | 17.33495 |
| 2119.655 | 17.27973 |
| 2119.732 | 17.22452 |
| 2119.808 | 17.04532 |
| 2119.884 | 16.86612 |
| 2119.96  | 16.54122 |
| 2120.036 | 16.21632 |
| 2120.113 | 15.77097 |
| 2120.189 | 15.32561 |
| 2120.265 | 14.81113 |
| 2120.341 | 14.29666 |
| 2120.417 | 13.78515 |
| 2120.494 | 13.27364 |
| 2120.57  | 12.81414 |
| 2120.646 | 12.35465 |
| 2120.722 | 11.94227 |
| 2120.798 | 11.5299  |
| 2120.875 | 11.14062 |
| 2120.951 | 10.75134 |

|          |          |
|----------|----------|
| 2121.027 | 10.37924 |
| 2121.103 | 10.00714 |
| 2121.179 | 9.664611 |
| 2121.256 | 9.322077 |
| 2121.332 | 9.042912 |
| 2121.408 | 8.763748 |
| 2121.484 | 8.600492 |
| 2121.56  | 8.437235 |
| 2121.637 | 8.429938 |
| 2121.713 | 8.422642 |
| 2121.789 | 8.555811 |
| 2121.865 | 8.68898  |
| 2121.941 | 8.916434 |
| 2122.018 | 9.143888 |
| 2122.094 | 9.42941  |
| 2122.17  | 9.714931 |
| 2122.246 | 10.06115 |
| 2122.322 | 10.40738 |
| 2122.399 | 10.84878 |
| 2122.475 | 11.29019 |
| 2122.551 | 11.82851 |
| 2122.627 | 12.36683 |
| 2122.703 | 12.93005 |
| 2122.78  | 13.49327 |
| 2122.856 | 13.9393  |
| 2122.932 | 14.38533 |
| 2123.008 | 14.56014 |
| 2123.084 | 14.73494 |
| 2123.161 | 14.5419  |
| 2123.237 | 14.34885 |
| 2123.313 | 13.81681 |
| 2123.389 | 13.28477 |
| 2123.465 | 12.54622 |
| 2123.542 | 11.80767 |
| 2123.618 | 11.06345 |
| 2123.694 | 10.31922 |
| 2123.77  | 9.73148  |
| 2123.846 | 9.14374  |
| 2123.923 | 8.788456 |
| 2123.999 | 8.433172 |
| 2124.075 | 8.313954 |
| 2124.151 | 8.194736 |
| 2124.227 | 8.273073 |
| 2124.304 | 8.35141  |
| 2124.38  | 8.572284 |
| 2124.456 | 8.793158 |
| 2124.532 | 9.104214 |

|          |          |
|----------|----------|
| 2124.608 | 9.41527  |
| 2124.685 | 9.752049 |
| 2124.761 | 10.08883 |
| 2124.837 | 10.40485 |
| 2124.913 | 10.72087 |
| 2124.989 | 11.0044  |
| 2125.066 | 11.28793 |
| 2125.142 | 11.54818 |
| 2125.218 | 11.80842 |
| 2125.294 | 12.04449 |
| 2125.37  | 12.28056 |
| 2125.447 | 12.49568 |
| 2125.523 | 12.7108  |
| 2125.599 | 12.91083 |
| 2125.675 | 13.11087 |
| 2125.751 | 13.25916 |
| 2125.828 | 13.40745 |
| 2125.904 | 13.44306 |
| 2125.98  | 13.47868 |
| 2126.056 | 13.35747 |
| 2126.132 | 13.23626 |
| 2126.209 | 12.95641 |
| 2126.285 | 12.67657 |
| 2126.361 | 12.29368 |
| 2126.437 | 11.9108  |
| 2126.513 | 11.51651 |
| 2126.59  | 11.12223 |
| 2126.666 | 10.79353 |
| 2126.742 | 10.46484 |
| 2126.818 | 10.25525 |
| 2126.894 | 10.04566 |
| 2126.971 | 9.973038 |
| 2127.047 | 9.900415 |
| 2127.123 | 9.925913 |
| 2127.199 | 9.95141  |
| 2127.275 | 9.979316 |
| 2127.352 | 10.00722 |
| 2127.428 | 9.964951 |
| 2127.504 | 9.92268  |
| 2127.58  | 9.808313 |
| 2127.656 | 9.693947 |
| 2127.733 | 9.556453 |
| 2127.809 | 9.418959 |
| 2127.885 | 9.307863 |
| 2127.961 | 9.196768 |
| 2128.037 | 9.149081 |
| 2128.114 | 9.101395 |

|          |          |
|----------|----------|
| 2128.19  | 9.120273 |
| 2128.266 | 9.139151 |
| 2128.342 | 9.207148 |
| 2128.418 | 9.275145 |
| 2128.495 | 9.348593 |
| 2128.571 | 9.422041 |
| 2128.647 | 9.462432 |
| 2128.723 | 9.502823 |
| 2128.799 | 9.489058 |
| 2128.876 | 9.475292 |
| 2128.952 | 9.429185 |
| 2129.028 | 9.383078 |
| 2129.104 | 9.344906 |
| 2129.18  | 9.306734 |
| 2129.257 | 9.295978 |
| 2129.333 | 9.285221 |
| 2129.409 | 9.281649 |
| 2129.485 | 9.278076 |
| 2129.561 | 9.262656 |
| 2129.638 | 9.247236 |
| 2129.714 | 9.199248 |
| 2129.79  | 9.15126  |
| 2129.866 | 9.058444 |
| 2129.942 | 8.965628 |
| 2130.019 | 8.837986 |
| 2130.095 | 8.710344 |
| 2130.171 | 8.596128 |
| 2130.247 | 8.481913 |
| 2130.323 | 8.440205 |
| 2130.4   | 8.398497 |
| 2130.476 | 8.457203 |
| 2130.552 | 8.515909 |
| 2130.628 | 8.663408 |
| 2130.704 | 8.810907 |
| 2130.781 | 9.004327 |
| 2130.857 | 9.197746 |
| 2130.933 | 9.389736 |
| 2131.009 | 9.581726 |
| 2131.085 | 9.737084 |
| 2131.162 | 9.892443 |
| 2131.238 | 9.985373 |
| 2131.314 | 10.0783  |
| 2131.39  | 10.09026 |
| 2131.466 | 10.10222 |
| 2131.543 | 10.04694 |
| 2131.619 | 9.991653 |
| 2131.695 | 9.884959 |



|          |          |
|----------|----------|
| 2131.771 | 9.778265 |
| 2131.847 | 9.640656 |
| 2131.924 | 9.503048 |
| 2132     | 9.363935 |
| 2132.076 | 9.224823 |
| 2132.152 | 9.14893  |
| 2132.228 | 9.073036 |
| 2132.305 | 9.121062 |
| 2132.381 | 9.169088 |
| 2132.457 | 9.350623 |
| 2132.533 | 9.532158 |
| 2132.609 | 9.789847 |
| 2132.686 | 10.04754 |
| 2132.762 | 10.27883 |
| 2132.838 | 10.51012 |
| 2132.914 | 10.62287 |
| 2132.99  | 10.73562 |
| 2133.067 | 10.69436 |
| 2133.143 | 10.6531  |
| 2133.219 | 10.49365 |
| 2133.295 | 10.33419 |
| 2133.371 | 10.14092 |
| 2133.448 | 9.947651 |
| 2133.524 | 9.810532 |
| 2133.6   | 9.673412 |
| 2133.676 | 7.414144 |
| 2133.752 | 7.858068 |
| 2133.829 | 7.743891 |
| 2133.905 | 7.400001 |
| 2133.981 | 7.377286 |
| 2134.057 | 7.549457 |
| 2134.133 | 7.715608 |
| 2134.21  | 7.94502  |
| 2134.286 | 8.119446 |
| 2134.362 | 8.051525 |
| 2134.438 | 7.693194 |
| 2134.514 | 7.510269 |
| 2134.591 | 7.990673 |
| 2134.667 | 9.249268 |
| 2134.743 | 10.78872 |
| 2134.819 | 12.51839 |
| 2134.895 | 14.2592  |
| 2134.972 | 15.45634 |
| 2135.048 | 15.45536 |
| 2135.124 | 14.91711 |
| 2135.2   | 15.29666 |
| 2135.276 | 16.24377 |

|          |          |
|----------|----------|
| 2135.353 | 16.02303 |
| 2135.429 | 14.59564 |
| 2135.505 | 13.60632 |
| 2135.581 | 13.21076 |
| 2135.657 | 12.1141  |
| 2135.734 | 10.95517 |
| 2135.81  | 11.07702 |
| 2135.886 | 11.82362 |
| 2135.962 | 11.77714 |
| 2136.038 | 11.14577 |
| 2136.115 | 10.57127 |
| 2136.191 | 9.859196 |
| 2136.267 | 9.146599 |
| 2136.343 | 8.936445 |
| 2136.419 | 9.065668 |
| 2136.496 | 8.752317 |
| 2136.572 | 7.884919 |
| 2136.648 | 7.116436 |
| 2136.724 | 7.015194 |
| 2136.8   | 7.292067 |
| 2136.877 | 7.261228 |
| 2136.953 | 7.336142 |
| 2137.029 | 7.696579 |
| 2137.105 | 8.059948 |
| 2137.181 | 8.215422 |
| 2137.258 | 8.126892 |
| 2137.334 | 8.14562  |
| 2137.41  | 8.70553  |
| 2137.486 | 9.715906 |
| 2137.562 | 11.2525  |
| 2137.639 | 12.93531 |
| 2137.715 | 13.67966 |
| 2137.791 | 13.6774  |
| 2137.867 | 13.77939 |
| 2137.943 | 14.02234 |
| 2138.02  | 14.48342 |
| 2138.096 | 15.60075 |
| 2138.172 | 17.03603 |
| 2138.248 | 17.9241  |
| 2138.324 | 17.29793 |
| 2138.401 | 15.39902 |
| 2138.477 | 13.49996 |
| 2138.553 | 11.98902 |
| 2138.629 | 10.18721 |
| 2138.705 | 7.767882 |
| 2138.782 | 5.195639 |
| 2138.858 | 3.396389 |

|          |          |
|----------|----------|
| 2138.934 | 2.871907 |
| 2139.01  | 3.023469 |
| 2139.086 | 3.060173 |
| 2139.163 | 2.826326 |
| 2139.239 | 2.613463 |
| 2139.315 | 2.718692 |
| 2139.391 | 3.03445  |
| 2139.467 | 3.20677  |
| 2139.544 | 3.19782  |
| 2139.62  | 2.994886 |
| 2139.696 | 2.857015 |
| 2139.772 | 3.31305  |
| 2139.848 | 4.232795 |
| 2139.925 | 4.689658 |
| 2140.001 | 4.510944 |
| 2140.077 | 4.46965  |
| 2140.153 | 5.019557 |
| 2140.229 | 5.530877 |
| 2140.306 | 5.451073 |
| 2140.382 | 5.057918 |
| 2140.458 | 4.807146 |
| 2140.534 | 4.723882 |
| 2140.61  | 4.73509  |
| 2140.687 | 4.760888 |
| 2140.763 | 4.853404 |
| 2140.839 | 5.27973  |
| 2140.915 | 5.844979 |
| 2140.991 | 6.416322 |
| 2141.068 | 7.308312 |
| 2141.144 | 8.290411 |
| 2141.22  | 8.574654 |
| 2141.296 | 8.44656  |
| 2141.372 | 8.601734 |
| 2141.449 | 8.859875 |
| 2141.525 | 9.114033 |
| 2141.601 | 9.501019 |
| 2141.677 | 9.634375 |
| 2141.753 | 9.306433 |
| 2141.83  | 8.997595 |
| 2141.906 | 9.544945 |
| 2141.982 | 10.888   |
| 2142.058 | 12.54344 |
| 2142.134 | 14.40572 |
| 2142.211 | 16.51584 |
| 2142.287 | 18.05348 |
| 2142.363 | 18.77502 |
| 2142.439 | 19.5372  |

|          |          |
|----------|----------|
| 2142.515 | 20.85506 |
| 2142.592 | 22.82671 |
| 2142.668 | 25.92546 |
| 2142.744 | 29.52275 |
| 2142.82  | 30.65785 |
| 2142.896 | 28.20015 |
| 2142.973 | 24.77443 |
| 2143.049 | 22.47342 |
| 2143.125 | 21.21188 |
| 2143.201 | 21.04221 |
| 2143.277 | 21.36006 |
| 2143.354 | 21.20985 |
| 2143.43  | 20.44287 |
| 2143.506 | 19.15382 |
| 2143.582 | 17.95486 |
| 2143.658 | 17.96194 |
| 2143.735 | 18.99992 |
| 2143.811 | 19.88408 |
| 2143.887 | 21.24799 |
| 2143.963 | 24.01204 |
| 2144.039 | 26.99382 |
| 2144.116 | 28.31688 |
| 2144.192 | 28.21527 |
| 2144.268 | 27.95006 |
| 2144.344 | 27.49086 |
| 2144.42  | 26.21242 |
| 2144.497 | 24.51065 |
| 2144.573 | 22.80173 |
| 2144.649 | 21.4012  |
| 2144.725 | 20.52975 |
| 2144.801 | 20.10928 |
| 2144.878 | 19.28386 |
| 2144.954 | 18.1727  |
| 2145.03  | 18.03777 |
| 2145.106 | 19.01497 |
| 2145.182 | 20.23212 |
| 2145.259 | 20.698   |
| 2145.335 | 20.50546 |
| 2145.411 | 20.63783 |
| 2145.487 | 21.8607  |
| 2145.563 | 23.0419  |
| 2145.64  | 22.80016 |
| 2145.716 | 21.30673 |
| 2145.792 | 19.74194 |
| 2145.868 | 18.78459 |
| 2145.944 | 18.07108 |
| 2146.021 | 17.12697 |

|          |          |
|----------|----------|
| 2146.097 | 16.09816 |
| 2146.173 | 15.44889 |
| 2146.249 | 14.94397 |
| 2146.325 | 14.04995 |
| 2146.402 | 12.5909  |
| 2146.478 | 11.33441 |
| 2146.554 | 10.89432 |
| 2146.63  | 10.74863 |
| 2146.706 | 10.6328  |
| 2146.783 | 10.68718 |
| 2146.859 | 10.74577 |
| 2146.935 | 10.79624 |
| 2147.011 | 10.91042 |
| 2147.087 | 11.14231 |
| 2147.164 | 11.73487 |
| 2147.24  | 12.82129 |
| 2147.316 | 14.00286 |
| 2147.392 | 14.52524 |
| 2147.468 | 14.15051 |
| 2147.545 | 13.62339 |
| 2147.621 | 13.64348 |
| 2147.697 | 13.59654 |
| 2147.773 | 13.02475 |
| 2147.849 | 12.27657 |
| 2147.926 | 11.86123 |
| 2148.002 | 11.6768  |
| 2148.078 | 11.7636  |
| 2148.154 | 12.33253 |
| 2148.23  | 12.85739 |
| 2148.307 | 12.70703 |
| 2148.383 | 12.04611 |
| 2148.459 | 11.5642  |
| 2148.535 | 11.75758 |
| 2148.611 | 12.44633 |
| 2148.688 | 13.3205  |
| 2148.764 | 14.24528 |
| 2148.84  | 14.62475 |
| 2148.916 | 14.30726 |
| 2148.992 | 14.112   |
| 2149.069 | 14.32441 |
| 2149.145 | 14.36826 |
| 2149.221 | 13.6762  |
| 2149.297 | 12.76157 |
| 2149.373 | 12.11884 |
| 2149.45  | 11.5742  |
| 2149.526 | 11.03467 |
| 2149.602 | 11.00323 |

|          |          |
|----------|----------|
| 2149.678 | 12.17999 |
| 2149.754 | 14.72554 |
| 2149.831 | 17.42053 |
| 2149.907 | 18.51515 |
| 2149.983 | 18.74411 |
| 2150.059 | 19.23528 |
| 2150.135 | 19.60873 |
| 2150.212 | 19.62204 |
| 2150.288 | 19.69702 |
| 2150.364 | 19.88318 |
| 2150.44  | 19.9247  |
| 2150.516 | 19.61385 |
| 2150.593 | 18.95584 |
| 2150.669 | 18.4431  |
| 2150.745 | 18.54262 |
| 2150.821 | 18.49448 |
| 2150.897 | 17.2428  |
| 2150.974 | 15.57511 |
| 2151.05  | 14.92569 |
| 2151.126 | 15.08011 |
| 2151.202 | 15.20602 |
| 2151.278 | 15.28372 |
| 2151.355 | 15.41098 |
| 2151.431 | 15.57811 |
| 2151.507 | 15.83987 |
| 2151.583 | 15.87642 |
| 2151.659 | 15.60128 |
| 2151.736 | 15.50877 |
| 2151.812 | 15.53923 |
| 2151.888 | 15.43994 |
| 2151.964 | 15.68981 |
| 2152.04  | 16.16269 |
| 2152.117 | 16.21368 |
| 2152.193 | 16.39459 |
| 2152.269 | 17.41881 |
| 2152.345 | 18.54134 |
| 2152.421 | 19.06882 |
| 2152.498 | 19.35698 |
| 2152.574 | 19.76382 |
| 2152.65  | 19.86649 |
| 2152.726 | 19.45709 |
| 2152.802 | 18.97668 |
| 2152.879 | 18.67635 |
| 2152.955 | 18.14856 |
| 2153.031 | 17.30396 |
| 2153.107 | 16.60767 |
| 2153.183 | 16.00218 |

|          |          |
|----------|----------|
| 2153.26  | 15.25514 |
| 2153.336 | 14.66898 |
| 2153.412 | 14.30418 |
| 2153.488 | 13.82542 |
| 2153.564 | 13.67311 |
| 2153.641 | 14.33171 |
| 2153.717 | 15.08838 |
| 2153.793 | 15.04897 |
| 2153.869 | 14.93968 |
| 2153.945 | 16.14427 |
| 2154.022 | 17.91223 |
| 2154.098 | 18.668   |
| 2154.174 | 18.63475 |
| 2154.25  | 18.99774 |
| 2154.326 | 19.19768 |
| 2154.403 | 18.82874 |
| 2154.479 | 18.83701 |
| 2154.555 | 19.36488 |
| 2154.631 | 18.76758 |
| 2154.707 | 16.90741 |
| 2154.784 | 15.62452 |
| 2154.86  | 15.66665 |
| 2154.936 | 16.36623 |
| 2155.012 | 16.34984 |
| 2155.088 | 14.98157 |
| 2155.165 | 13.59564 |
| 2155.241 | 13.65032 |
| 2155.317 | 14.28635 |
| 2155.393 | 14.62445 |
| 2155.469 | 15.02701 |
| 2155.546 | 15.75931 |
| 2155.622 | 16.39015 |
| 2155.698 | 16.7897  |
| 2155.774 | 16.59346 |
| 2155.85  | 16.17255 |
| 2155.927 | 16.84761 |
| 2156.003 | 18.82091 |
| 2156.079 | 21.22995 |
| 2156.155 | 23.97375 |
| 2156.231 | 26.27769 |
| 2156.308 | 26.80684 |
| 2156.384 | 25.90659 |
| 2156.46  | 24.90508 |
| 2156.536 | 24.1144  |
| 2156.612 | 23.88101 |
| 2156.689 | 24.00497 |
| 2156.765 | 23.41663 |

|          |          |
|----------|----------|
| 2156.841 | 21.26906 |
| 2156.917 | 17.99075 |
| 2156.993 | 15.28733 |
| 2157.07  | 14.32358 |
| 2157.146 | 14.54299 |
| 2157.222 | 14.97202 |
| 2157.298 | 15.31396 |
| 2157.374 | 15.49199 |
| 2157.451 | 15.64987 |
| 2157.527 | 16.04648 |
| 2157.603 | 16.65355 |
| 2157.679 | 16.95563 |
| 2157.755 | 16.51186 |
| 2157.832 | 15.68048 |
| 2157.908 | 15.26191 |
| 2157.984 | 15.19902 |
| 2158.06  | 15.00264 |
| 2158.136 | 14.63069 |
| 2158.213 | 14.18669 |
| 2158.289 | 13.88492 |
| 2158.365 | 13.94592 |
| 2158.441 | 14.32449 |
| 2158.517 | 15.25055 |
| 2158.594 | 16.20752 |
| 2158.67  | 16.03287 |
| 2158.746 | 14.84664 |
| 2158.822 | 13.7229  |
| 2158.898 | 13.27732 |
| 2158.975 | 13.38541 |
| 2159.051 | 13.83949 |
| 2159.127 | 13.72652 |
| 2159.203 | 12.94705 |
| 2159.279 | 12.44077 |
| 2159.356 | 12.43061 |
| 2159.432 | 12.54705 |
| 2159.508 | 12.81911 |
| 2159.584 | 12.91885 |
| 2159.66  | 12.34818 |
| 2159.737 | 12.01828 |
| 2159.813 | 12.59466 |
| 2159.889 | 13.38894 |
| 2159.965 | 13.73216 |
| 2160.041 | 13.76713 |
| 2160.118 | 13.85303 |
| 2160.194 | 13.86499 |
| 2160.27  | 13.67228 |
| 2160.346 | 13.31155 |



|          |          |
|----------|----------|
| 2160.422 | 12.80436 |
| 2160.499 | 12.34299 |
| 2160.575 | 12.20075 |
| 2160.651 | 12.12268 |
| 2160.727 | 11.93735 |
| 2160.803 | 11.87589 |
| 2160.88  | 11.85596 |
| 2160.956 | 11.98947 |
| 2161.032 | 12.57172 |
| 2161.108 | 13.29274 |
| 2161.184 | 13.6067  |
| 2161.261 | 13.8328  |
| 2161.337 | 14.38669 |
| 2161.413 | 14.89192 |
| 2161.489 | 14.73366 |
| 2161.565 | 13.98233 |
| 2161.642 | 13.51538 |
| 2161.718 | 13.61655 |
| 2161.794 | 14.14893 |
| 2161.87  | 15.20286 |
| 2161.946 | 16.16248 |
| 2162.023 | 16.3903  |
| 2162.099 | 16.50177 |
| 2162.175 | 16.59805 |
| 2162.251 | 15.93366 |
| 2162.327 | 14.91621 |
| 2162.404 | 14.26243 |
| 2162.48  | 13.85295 |
| 2162.556 | 13.60918 |
| 2162.632 | 13.2789  |
| 2162.708 | 13.05453 |
| 2162.785 | 13.54517 |
| 2162.861 | 14.50974 |
| 2162.937 | 15.03723 |
| 2163.013 | 15.11674 |
| 2163.089 | 15.5302  |
| 2163.166 | 15.8519  |
| 2163.242 | 15.19173 |
| 2163.318 | 14.50102 |
| 2163.394 | 14.96481 |
| 2163.47  | 15.48981 |
| 2163.547 | 15.08086 |
| 2163.623 | 14.0698  |
| 2163.699 | 13.08988 |
| 2163.775 | 12.93825 |
| 2163.851 | 13.57819 |
| 2163.928 | 13.42874 |

|          |          |
|----------|----------|
| 2164.004 | 12.04483 |
| 2164.08  | 10.99097 |
| 2164.156 | 11.17006 |
| 2164.232 | 11.98767 |
| 2164.309 | 12.49598 |
| 2164.385 | 12.6325  |
| 2164.461 | 12.76555 |
| 2164.537 | 13.00767 |
| 2164.613 | 13.06785 |
| 2164.69  | 12.60203 |
| 2164.766 | 11.70591 |
| 2164.842 | 11.2701  |
| 2164.918 | 11.84378 |
| 2164.994 | 12.45235 |
| 2165.071 | 12.38722 |
| 2165.147 | 12.35991 |
| 2165.223 | 12.98887 |
| 2165.299 | 14.03212 |
| 2165.375 | 15.65348 |
| 2165.452 | 17.34306 |
| 2165.528 | 18.40015 |
| 2165.604 | 18.57939 |
| 2165.68  | 17.92787 |
| 2165.756 | 17.13704 |
| 2165.833 | 16.51381 |
| 2165.909 | 15.71192 |
| 2165.985 | 14.94765 |
| 2166.061 | 14.61339 |
| 2166.137 | 14.46386 |
| 2166.214 | 14.35291 |
| 2166.29  | 14.23024 |
| 2166.366 | 13.93487 |
| 2166.442 | 13.63979 |
| 2166.518 | 13.3393  |
| 2166.595 | 12.89741 |
| 2166.671 | 12.33291 |
| 2166.747 | 11.89688 |
| 2166.823 | 11.50237 |
| 2166.899 | 11.05423 |
| 2166.976 | 10.6883  |
| 2167.052 | 10.27785 |
| 2167.128 | 10.00015 |
| 2167.204 | 10.70139 |
| 2167.28  | 12.36864 |
| 2167.357 | 13.77382 |
| 2167.433 | 14.36533 |
| 2167.509 | 14.5973  |

|          |          |
|----------|----------|
| 2167.585 | 14.97495 |
| 2167.661 | 15.81565 |
| 2167.738 | 16.7906  |
| 2167.814 | 17.69951 |
| 2167.89  | 18.34682 |
| 2167.966 | 18.33058 |
| 2168.042 | 17.52403 |
| 2168.119 | 16.4771  |
| 2168.195 | 15.57029 |
| 2168.271 | 14.85446 |
| 2168.347 | 14.17969 |
| 2168.423 | 13.71832 |
| 2168.5   | 14.05205 |
| 2168.576 | 14.85423 |
| 2168.652 | 15.03934 |
| 2168.728 | 14.62309 |
| 2168.804 | 14.10094 |
| 2168.881 | 13.38022 |
| 2168.957 | 13.08951 |
| 2169.033 | 13.60038 |
| 2169.109 | 13.60534 |
| 2169.185 | 12.41143 |
| 2169.262 | 11.21128 |
| 2169.338 | 10.87597 |
| 2169.414 | 11.01783 |
| 2169.49  | 11.12291 |
| 2169.566 | 11.3742  |
| 2169.643 | 11.84694 |
| 2169.719 | 12.03829 |
| 2169.795 | 11.74479 |
| 2169.871 | 11.70365 |
| 2169.947 | 12.29733 |
| 2170.024 | 13.01339 |
| 2170.1   | 12.93622 |
| 2170.176 | 12.58706 |
| 2170.252 | 12.60361 |
| 2170.328 | 12.29793 |
| 2170.405 | 11.64521 |
| 2170.481 | 11.64693 |
| 2170.557 | 12.30079 |
| 2170.633 | 12.71335 |
| 2170.709 | 12.59963 |
| 2170.786 | 11.93607 |
| 2170.862 | 11.20903 |
| 2170.938 | 10.78225 |
| 2171.014 | 10.55991 |
| 2171.09  | 10.49966 |

|          |          |
|----------|----------|
| 2171.167 | 10.45581 |
| 2171.243 | 10.16503 |
| 2171.319 | 9.69628  |
| 2171.395 | 9.360964 |
| 2171.471 | 8.967434 |
| 2171.548 | 8.418056 |
| 2171.624 | 8.01482  |
| 2171.7   | 7.81497  |
| 2171.776 | 7.747501 |
| 2171.852 | 7.991577 |
| 2171.929 | 8.366005 |
| 2172.005 | 8.505831 |
| 2172.081 | 8.607298 |
| 2172.157 | 9.050922 |
| 2172.233 | 9.271383 |
| 2172.31  | 8.71937  |
| 2172.386 | 7.90222  |
| 2172.462 | 7.798272 |
| 2172.538 | 8.430239 |
| 2172.614 | 9.042196 |
| 2172.691 | 9.508463 |
| 2172.767 | 10.11696 |
| 2172.843 | 10.65694 |
| 2172.919 | 10.72148 |
| 2172.995 | 10.84393 |
| 2173.072 | 11.28049 |
| 2173.148 | 11.90929 |
| 2173.224 | 12.55457 |
| 2173.3   | 13.13329 |
| 2173.376 | 13.74599 |
| 2173.453 | 14.73607 |
| 2173.529 | 15.5997  |
| 2173.605 | 15.68657 |
| 2173.681 | 15.51929 |
| 2173.757 | 15.53825 |
| 2173.834 | 15.41301 |
| 2173.91  | 15.34938 |
| 2173.986 | 15.51155 |
| 2174.062 | 15.29861 |
| 2174.138 | 14.80053 |
| 2174.215 | 14.63197 |
| 2174.291 | 15.11922 |
| 2174.367 | 16.09357 |
| 2174.443 | 17.11975 |
| 2174.519 | 17.51854 |
| 2174.596 | 17.62212 |
| 2174.672 | 17.84506 |

|          |          |
|----------|----------|
| 2174.748 | 17.36104 |
| 2174.824 | 16.31207 |
| 2174.9   | 15.57782 |
| 2174.977 | 15.32456 |
| 2175.053 | 15.5891  |
| 2175.129 | 16.32268 |
| 2175.205 | 16.46822 |
| 2175.281 | 15.82197 |
| 2175.358 | 15.60715 |
| 2175.434 | 16.319   |
| 2175.51  | 17.28598 |
| 2175.586 | 18.16187 |
| 2175.662 | 19.13367 |
| 2175.739 | 20.16577 |
| 2175.815 | 21.13893 |
| 2175.891 | 21.90666 |
| 2175.967 | 22.15472 |
| 2176.043 | 21.29883 |
| 2176.12  | 19.7551  |
| 2176.196 | 17.78044 |
| 2176.272 | 15.33885 |
| 2176.348 | 13.08627 |
| 2176.424 | 11.88199 |
| 2176.501 | 11.57466 |
| 2176.577 | 11.91606 |
| 2176.653 | 12.88657 |
| 2176.729 | 13.65514 |
| 2176.805 | 13.52938 |
| 2176.882 | 12.74006 |
| 2176.958 | 11.54284 |
| 2177.034 | 10.03618 |
| 2177.11  | 9.191729 |
| 2177.186 | 9.733961 |
| 2177.263 | 10.96465 |
| 2177.339 | 11.66235 |
| 2177.415 | 11.8161  |
| 2177.491 | 11.99534 |
| 2177.567 | 11.86363 |
| 2177.644 | 11.18608 |
| 2177.72  | 10.6419  |
| 2177.796 | 10.65649 |
| 2177.872 | 10.5026  |
| 2177.948 | 10.32471 |
| 2178.025 | 10.82016 |
| 2178.101 | 11.21798 |
| 2178.177 | 10.76713 |
| 2178.253 | 10.18112 |

|          |          |
|----------|----------|
| 2178.329 | 9.993233 |
| 2178.406 | 9.963446 |
| 2178.482 | 10.01632 |
| 2178.558 | 10.07935 |
| 2178.634 | 9.911848 |
| 2178.71  | 9.595638 |
| 2178.787 | 9.280331 |
| 2178.863 | 9.004063 |
| 2178.939 | 9.027529 |
| 2179.015 | 9.463936 |
| 2179.091 | 9.819481 |
| 2179.168 | 9.563595 |
| 2179.244 | 9.12381  |
| 2179.32  | 8.73193  |
| 2179.396 | 8.269049 |
| 2179.472 | 7.963747 |
| 2179.549 | 8.175331 |
| 2179.625 | 8.263557 |
| 2179.701 | 7.71215  |
| 2179.777 | 7.016623 |
| 2179.853 | 7.005192 |
| 2179.93  | 7.599626 |
| 2180.006 | 7.86762  |
| 2180.082 | 7.425801 |
| 2180.158 | 7.272435 |
| 2180.234 | 7.807673 |
| 2180.311 | 8.162922 |
| 2180.387 | 8.133587 |
| 2180.463 | 8.242123 |
| 2180.539 | 8.511848 |
| 2180.615 | 8.688005 |
| 2180.692 | 8.847088 |
| 2180.768 | 9.145094 |
| 2180.844 | 9.505682 |
| 2180.92  | 9.809933 |
| 2180.996 | 9.997145 |
| 2181.073 | 10.14577 |
| 2181.149 | 10.03716 |
| 2181.225 | 9.865891 |
| 2181.301 | 9.740278 |
| 2181.377 | 9.712673 |
| 2181.454 | 9.661753 |
| 2181.53  | 9.302296 |
| 2181.606 | 8.782175 |
| 2181.682 | 8.614893 |
| 2181.758 | 8.803612 |
| 2181.835 | 8.790373 |

|          |          |
|----------|----------|
| 2181.911 | 8.610607 |
| 2181.987 | 8.386312 |
| 2182.063 | 8.104553 |
| 2182.139 | 7.830541 |
| 2182.216 | 7.561417 |
| 2182.292 | 7.419859 |
| 2182.368 | 7.675895 |
| 2182.444 | 8.232645 |
| 2182.52  | 8.532835 |
| 2182.597 | 8.458143 |
| 2182.673 | 8.436031 |
| 2182.749 | 8.487328 |
| 2182.825 | 8.104628 |
| 2182.901 | 7.498759 |
| 2182.978 | 7.375781 |
| 2183.054 | 7.927192 |
| 2183.13  | 8.565327 |
| 2183.206 | 8.508236 |
| 2183.282 | 7.828208 |
| 2183.359 | 7.544793 |
| 2183.435 | 8.018656 |
| 2183.511 | 8.595339 |
| 2183.587 | 8.670933 |
| 2183.663 | 8.491615 |
| 2183.74  | 8.710117 |
| 2183.816 | 9.403086 |
| 2183.892 | 9.736292 |
| 2183.968 | 9.330652 |
| 2184.044 | 8.768259 |
| 2184.121 | 8.369238 |
| 2184.197 | 7.642874 |
| 2184.273 | 6.799174 |
| 2184.349 | 6.607523 |
| 2184.425 | 6.69056  |
| 2184.502 | 6.329823 |
| 2184.578 | 5.945694 |
| 2184.654 | 5.995037 |
| 2184.73  | 6.16337  |
| 2184.806 | 6.362243 |
| 2184.883 | 6.4525   |
| 2184.959 | 6.434902 |
| 2185.035 | 6.672885 |
| 2185.111 | 7.216849 |
| 2185.187 | 7.572021 |
| 2185.264 | 7.613915 |
| 2185.34  | 7.667019 |
| 2185.416 | 7.586011 |

|          |          |
|----------|----------|
| 2185.492 | 6.986161 |
| 2185.568 | 6.049492 |
| 2185.645 | 5.450545 |
| 2185.721 | 5.486198 |
| 2185.797 | 6.165401 |
| 2185.873 | 6.791426 |
| 2185.949 | 6.705302 |
| 2186.026 | 6.508086 |
| 2186.102 | 7.193307 |
| 2186.178 | 8.445282 |
| 2186.254 | 9.382101 |
| 2186.33  | 9.878979 |
| 2186.407 | 10.12366 |
| 2186.483 | 10.07476 |
| 2186.559 | 9.701618 |
| 2186.635 | 9.029036 |
| 2186.711 | 8.494926 |
| 2186.788 | 8.735992 |
| 2186.864 | 9.525461 |
| 2186.94  | 10.08123 |
| 2187.016 | 10.19752 |
| 2187.092 | 10.03295 |
| 2187.169 | 9.976307 |
| 2187.245 | 10.2704  |
| 2187.321 | 10.36224 |
| 2187.397 | 9.995792 |
| 2187.473 | 9.384657 |
| 2187.55  | 9.007673 |
| 2187.626 | 9.142612 |
| 2187.702 | 9.561039 |
| 2187.778 | 9.979845 |
| 2187.854 | 10.1651  |
| 2187.931 | 9.908766 |
| 2188.007 | 9.478529 |
| 2188.083 | 9.474842 |
| 2188.159 | 9.563749 |
| 2188.235 | 9.334036 |
| 2188.312 | 8.880106 |
| 2188.388 | 8.777889 |
| 2188.464 | 9.107035 |
| 2188.54  | 9.707184 |
| 2188.616 | 10.10184 |
| 2188.693 | 10.09906 |
| 2188.769 | 9.867996 |
| 2188.845 | 9.982174 |
| 2188.921 | 10.74163 |
| 2188.997 | 11.28537 |



|          |          |
|----------|----------|
| 2189.074 | 10.53674 |
| 2189.15  | 9.201883 |
| 2189.226 | 8.866945 |
| 2189.302 | 9.077848 |
| 2189.378 | 9.15675  |
| 2189.455 | 9.087101 |
| 2189.531 | 8.485521 |
| 2189.607 | 7.5126   |
| 2189.683 | 7.160738 |
| 2189.759 | 7.205643 |
| 2189.836 | 6.918617 |
| 2189.912 | 6.578413 |
| 2189.988 | 6.60346  |
| 2190.064 | 6.816549 |
| 2190.14  | 7.103122 |
| 2190.217 | 7.496051 |
| 2190.293 | 7.610457 |
| 2190.369 | 7.230012 |
| 2190.445 | 6.827529 |
| 2190.521 | 6.676872 |
| 2190.598 | 6.605116 |
| 2190.674 | 6.584356 |
| 2190.75  | 6.287703 |
| 2190.826 | 5.690335 |
| 2190.902 | 5.67973  |
| 2190.979 | 6.414216 |
| 2191.055 | 7.082438 |
| 2191.131 | 7.248742 |
| 2191.207 | 6.735165 |
| 2191.283 | 5.996616 |
| 2191.36  | 6.127493 |
| 2191.436 | 7.02362  |
| 2191.512 | 7.345921 |
| 2191.588 | 7.028208 |
| 2191.664 | 6.981498 |
| 2191.741 | 7.124032 |
| 2191.817 | 6.927269 |
| 2191.893 | 6.835278 |
| 2191.969 | 7.222265 |
| 2192.045 | 7.60662  |
| 2192.122 | 7.773448 |
| 2192.198 | 7.98729  |
| 2192.274 | 8.108315 |
| 2192.35  | 7.802858 |
| 2192.426 | 7.443778 |
| 2192.503 | 7.678828 |
| 2192.579 | 8.008953 |

|          |          |
|----------|----------|
| 2192.655 | 7.765403 |
| 2192.731 | 7.540654 |
| 2192.807 | 7.830989 |
| 2192.884 | 7.978639 |
| 2192.96  | 7.664009 |
| 2193.036 | 7.492592 |
| 2193.112 | 7.676121 |
| 2193.188 | 7.710796 |
| 2193.265 | 7.276796 |
| 2193.341 | 6.985109 |
| 2193.417 | 7.233999 |
| 2193.493 | 7.496278 |
| 2193.569 | 7.464011 |
| 2193.646 | 7.358105 |
| 2193.722 | 7.298082 |
| 2193.798 | 7.353368 |
| 2193.874 | 7.506282 |
| 2193.95  | 7.751336 |
| 2194.027 | 8.562017 |
| 2194.103 | 9.472359 |
| 2194.179 | 9.633398 |
| 2194.255 | 9.219107 |
| 2194.331 | 8.843479 |
| 2194.408 | 8.449795 |
| 2194.484 | 8.615797 |
| 2194.56  | 9.364574 |
| 2194.636 | 9.412636 |
| 2194.712 | 8.594437 |
| 2194.789 | 8.113201 |
| 2194.865 | 8.312077 |
| 2194.941 | 8.359913 |
| 2195.017 | 8.378038 |
| 2195.093 | 8.531931 |
| 2195.17  | 8.490713 |
| 2195.246 | 8.40963  |
| 2195.322 | 8.920649 |
| 2195.398 | 9.869051 |
| 2195.474 | 9.948402 |
| 2195.551 | 9.033922 |
| 2195.627 | 8.096729 |
| 2195.703 | 7.86499  |
| 2195.779 | 7.763897 |
| 2195.855 | 7.412036 |
| 2195.932 | 7.057692 |
| 2196.008 | 6.634976 |
| 2196.084 | 6.11764  |
| 2196.16  | 6.105002 |

|          |          |
|----------|----------|
| 2196.236 | 6.711772 |
| 2196.313 | 7.168411 |
| 2196.389 | 7.039038 |
| 2196.465 | 6.86762  |
| 2196.541 | 7.183002 |
| 2196.617 | 7.501393 |
| 2196.694 | 7.218505 |
| 2196.77  | 6.842949 |
| 2196.846 | 7.161641 |
| 2196.922 | 7.971795 |
| 2196.998 | 8.379015 |
| 2197.075 | 7.994811 |
| 2197.151 | 7.270704 |
| 2197.227 | 6.822566 |
| 2197.303 | 6.727568 |
| 2197.379 | 7.047764 |
| 2197.456 | 7.645055 |
| 2197.532 | 8.324409 |
| 2197.608 | 8.652426 |
| 2197.684 | 8.310043 |
| 2197.76  | 7.866643 |
| 2197.837 | 7.941633 |
| 2197.913 | 8.132231 |
| 2197.989 | 7.973526 |
| 2198.065 | 7.569841 |
| 2198.141 | 7.171268 |
| 2198.218 | 6.849793 |
| 2198.294 | 6.589846 |
| 2198.37  | 6.431817 |
| 2198.446 | 6.497557 |
| 2198.522 | 6.544492 |
| 2198.599 | 6.50252  |
| 2198.675 | 6.415796 |
| 2198.751 | 6.373374 |
| 2198.827 | 6.608199 |
| 2198.903 | 7.020837 |
| 2198.98  | 7.102371 |
| 2199.056 | 6.777061 |
| 2199.132 | 6.387892 |
| 2199.208 | 6.388794 |
| 2199.284 | 6.905831 |
| 2199.361 | 7.405944 |
| 2199.437 | 7.702671 |
| 2199.513 | 7.678075 |
| 2199.589 | 7.389846 |
| 2199.665 | 7.446561 |
| 2199.742 | 7.938849 |

|          |          |
|----------|----------|
| 2199.818 | 8.082438 |
| 2199.894 | 7.687176 |
| 2199.97  | 7.391953 |
| 2200.046 | 7.315534 |
| 2200.123 | 7.365627 |
| 2200.199 | 7.618052 |
| 2200.275 | 8.264009 |
| 2200.351 | 9.0595   |
| 2200.427 | 9.749907 |
| 2200.504 | 10.22422 |
| 2200.58  | 10.86754 |
| 2200.656 | 12.26424 |
| 2200.732 | 13.44265 |
| 2200.808 | 12.90854 |
| 2200.885 | 11.28281 |
| 2200.961 | 10.1381  |
| 2201.037 | 9.568789 |
| 2201.113 | 9.155172 |
| 2201.189 | 8.821287 |
| 2201.266 | 8.618958 |
| 2201.342 | 8.631821 |
| 2201.418 | 8.708612 |
| 2201.494 | 8.543589 |
| 2201.57  | 8.347198 |
| 2201.647 | 8.642876 |
| 2201.723 | 9.276421 |
| 2201.799 | 9.755697 |
| 2201.875 | 9.963749 |
| 2201.951 | 9.783606 |
| 2202.028 | 8.972548 |
| 2202.104 | 8.080181 |
| 2202.18  | 7.791428 |
| 2202.256 | 7.961491 |
| 2202.332 | 8.160738 |
| 2202.409 | 8.508841 |
| 2202.485 | 9.000753 |
| 2202.561 | 9.385107 |
| 2202.637 | 9.453028 |
| 2202.713 | 9.422792 |
| 2202.79  | 9.59985  |
| 2202.866 | 9.973675 |
| 2202.942 | 10.20835 |
| 2203.018 | 10.10636 |
| 2203.094 | 9.872282 |
| 2203.171 | 9.377659 |
| 2203.247 | 8.665442 |
| 2203.323 | 8.348404 |

|          |          |
|----------|----------|
| 2203.399 | 8.566305 |
| 2203.475 | 8.659046 |
| 2203.552 | 8.613016 |
| 2203.628 | 8.566229 |
| 2203.704 | 8.174355 |
| 2203.78  | 7.582327 |
| 2203.856 | 7.825801 |
| 2203.933 | 9.046185 |
| 2204.009 | 9.962393 |
| 2204.085 | 9.785934 |
| 2204.161 | 9.549004 |
| 2204.237 | 9.817074 |
| 2204.314 | 10.01986 |
| 2204.39  | 10.06739 |
| 2204.466 | 10.16646 |
| 2204.542 | 9.868898 |
| 2204.618 | 9.407297 |
| 2204.695 | 9.182024 |
| 2204.771 | 9.052805 |
| 2204.847 | 9.048443 |
| 2204.923 | 9.634975 |
| 2204.999 | 10.12132 |
| 2205.076 | 9.916512 |
| 2205.152 | 9.940128 |
| 2205.228 | 10.56006 |
| 2205.304 | 11.0346  |
| 2205.38  | 10.96307 |
| 2205.457 | 10.58579 |
| 2205.533 | 9.639038 |
| 2205.609 | 8.786613 |
| 2205.685 | 8.848366 |
| 2205.761 | 9.057842 |
| 2205.838 | 8.54344  |
| 2205.914 | 8.066645 |
| 2205.99  | 8.304852 |
| 2206.066 | 8.938175 |
| 2206.142 | 9.615797 |
| 2206.219 | 10.21173 |
| 2206.295 | 10.45807 |
| 2206.371 | 10.08725 |
| 2206.447 | 9.404816 |
| 2206.523 | 9.067318 |
| 2206.6   | 9.314554 |
| 2206.676 | 9.746449 |
| 2206.752 | 9.951035 |
| 2206.828 | 9.6689   |
| 2206.904 | 9.325537 |

|          |          |
|----------|----------|
| 2206.981 | 8.89327  |
| 2207.057 | 8.378036 |
| 2207.133 | 8.34141  |
| 2207.209 | 8.865515 |
| 2207.285 | 9.064011 |
| 2207.362 | 8.852879 |
| 2207.438 | 8.685598 |
| 2207.514 | 8.450323 |
| 2207.59  | 8.046333 |
| 2207.666 | 7.795414 |
| 2207.743 | 7.729825 |
| 2207.819 | 7.512074 |
| 2207.895 | 7.108463 |
| 2207.971 | 6.699812 |
| 2208.047 | 6.367432 |
| 2208.124 | 5.998648 |
| 2208.2   | 5.743965 |
| 2208.276 | 5.96277  |
| 2208.352 | 6.697332 |
| 2208.428 | 6.989997 |
| 2208.505 | 6.487403 |
| 2208.581 | 5.955472 |
| 2208.657 | 5.953592 |
| 2208.733 | 6.537271 |
| 2208.809 | 7.40707  |
| 2208.886 | 8.181799 |
| 2208.962 | 8.730801 |
| 2209.038 | 9.170143 |
| 2209.114 | 9.328697 |
| 2209.19  | 8.986914 |
| 2209.267 | 8.407373 |
| 2209.343 | 8.090185 |
| 2209.419 | 7.916811 |
| 2209.495 | 7.809179 |
| 2209.571 | 8.076422 |
| 2209.648 | 8.468071 |
| 2209.724 | 8.331856 |
| 2209.8   | 8.041672 |
| 2209.876 | 7.712149 |
| 2209.952 | 7.011283 |
| 2210.029 | 6.483265 |
| 2210.105 | 6.637008 |
| 2210.181 | 6.838362 |
| 2210.257 | 6.605416 |
| 2210.333 | 6.467018 |
| 2210.41  | 7.116814 |
| 2210.486 | 8.059498 |

|          |          |
|----------|----------|
| 2210.562 | 8.510796 |
| 2210.638 | 8.435053 |
| 2210.714 | 8.21858  |
| 2210.791 | 7.908539 |
| 2210.867 | 7.812412 |
| 2210.943 | 8.118393 |
| 2211.019 | 8.674692 |
| 2211.095 | 9.509214 |
| 2211.172 | 11.12388 |
| 2211.248 | 13.64731 |
| 2211.324 | 15.91606 |
| 2211.4   | 16.79926 |
| 2211.476 | 16.39894 |
| 2211.553 | 15.93073 |
| 2211.629 | 16.0616  |
| 2211.705 | 16.70793 |
| 2211.781 | 16.91003 |
| 2211.857 | 16.09575 |
| 2211.934 | 14.3991  |
| 2212.01  | 12.61519 |
| 2212.086 | 11.79857 |
| 2212.162 | 11.52426 |
| 2212.238 | 10.82542 |
| 2212.315 | 9.984434 |
| 2212.391 | 9.622568 |
| 2212.467 | 9.113728 |
| 2212.543 | 8.361042 |
| 2212.619 | 7.966002 |
| 2212.696 | 7.861229 |
| 2212.772 | 7.995488 |
| 2212.848 | 8.65288  |
| 2212.924 | 9.429634 |
| 2213     | 9.430391 |
| 2213.077 | 8.587065 |
| 2213.153 | 7.732456 |
| 2213.229 | 7.364499 |
| 2213.305 | 7.151336 |
| 2213.381 | 7.037233 |
| 2213.458 | 6.962393 |
| 2213.534 | 6.947726 |
| 2213.61  | 7.171193 |
| 2213.686 | 7.431214 |
| 2213.762 | 7.069952 |
| 2213.839 | 6.270253 |
| 2213.915 | 6.005643 |
| 2213.991 | 6.526063 |
| 2214.067 | 7.41166  |

|          |          |
|----------|----------|
| 2214.143 | 8.236181 |
| 2214.22  | 8.89094  |
| 2214.296 | 9.317793 |
| 2214.372 | 9.607296 |
| 2214.448 | 9.532156 |
| 2214.524 | 9.122154 |
| 2214.601 | 8.931404 |
| 2214.677 | 8.72426  |
| 2214.753 | 7.953067 |
| 2214.829 | 7.202182 |
| 2214.905 | 7.089583 |
| 2214.982 | 7.294999 |
| 2215.058 | 7.455962 |
| 2215.134 | 7.426102 |
| 2215.21  | 7.321325 |
| 2215.286 | 7.601053 |
| 2215.363 | 8.422417 |
| 2215.439 | 9.115608 |
| 2215.515 | 9.064236 |
| 2215.591 | 8.654234 |
| 2215.667 | 8.620686 |
| 2215.744 | 8.828279 |
| 2215.82  | 8.947727 |
| 2215.896 | 9.271156 |
| 2215.972 | 9.895676 |
| 2216.048 | 10.49342 |
| 2216.125 | 10.86657 |
| 2216.201 | 11.26296 |
| 2216.277 | 12.03941 |
| 2216.353 | 13.12742 |
| 2216.429 | 14.08876 |
| 2216.506 | 14.81264 |
| 2216.582 | 15.50553 |
| 2216.658 | 15.88861 |
| 2216.734 | 15.47266 |
| 2216.81  | 14.52787 |
| 2216.887 | 13.91787 |
| 2216.963 | 13.71478 |
| 2217.039 | 13.2328  |
| 2217.115 | 12.30335 |
| 2217.191 | 11.79692 |
| 2217.268 | 11.49018 |
| 2217.344 | 10.89688 |
| 2217.42  | 10.70214 |
| 2217.496 | 11.26769 |
| 2217.572 | 11.24671 |
| 2217.649 | 10.11621 |



|          |          |
|----------|----------|
| 2217.725 | 8.800303 |
| 2217.801 | 7.972851 |
| 2217.877 | 7.584056 |
| 2217.953 | 7.653028 |
| 2218.03  | 8.010983 |
| 2218.106 | 8.453781 |
| 2218.182 | 8.755024 |
| 2218.258 | 8.856865 |
| 2218.334 | 8.774052 |
| 2218.411 | 8.66559  |
| 2218.487 | 8.404667 |
| 2218.563 | 7.927569 |
| 2218.639 | 7.705606 |
| 2218.715 | 7.746974 |
| 2218.792 | 7.633623 |
| 2218.868 | 7.532757 |
| 2218.944 | 7.951262 |
| 2219.02  | 8.371719 |
| 2219.096 | 8.084845 |
| 2219.173 | 7.454458 |
| 2219.249 | 7.549533 |
| 2219.325 | 8.098236 |
| 2219.401 | 8.216927 |
| 2219.477 | 7.942689 |
| 2219.554 | 7.784808 |
| 2219.63  | 7.792106 |
| 2219.706 | 8.081387 |
| 2219.782 | 8.511473 |
| 2219.858 | 8.353292 |
| 2219.935 | 8.247236 |
| 2220.011 | 8.85017  |
| 2220.087 | 9.476574 |
| 2220.163 | 9.074089 |
| 2220.239 | 8.125387 |
| 2220.316 | 7.74216  |
| 2220.392 | 8.247238 |
| 2220.468 | 9.270929 |
| 2220.544 | 10.20233 |
| 2220.62  | 10.70177 |
| 2220.697 | 10.62851 |
| 2220.773 | 10.40805 |
| 2220.849 | 10.6786  |
| 2220.925 | 11.14442 |
| 2221.001 | 11.2886  |
| 2221.078 | 11.30463 |
| 2221.154 | 11.64152 |
| 2221.23  | 12.13765 |

|          |          |
|----------|----------|
| 2221.306 | 12.55766 |
| 2221.382 | 13.06078 |
| 2221.459 | 14.1226  |
| 2221.535 | 16.43288 |
| 2221.611 | 19.87085 |
| 2221.687 | 23.60684 |
| 2221.763 | 26.50636 |
| 2221.84  | 27.25851 |
| 2221.916 | 25.61015 |
| 2221.992 | 22.4185  |
| 2222.068 | 18.75615 |
| 2222.144 | 15.44228 |
| 2222.221 | 12.98691 |
| 2222.297 | 11.36879 |
| 2222.373 | 10.51004 |
| 2222.449 | 10.478   |
| 2222.525 | 10.98639 |
| 2222.602 | 11.58849 |
| 2222.678 | 11.61647 |
| 2222.754 | 11.45882 |
| 2222.83  | 12.06273 |
| 2222.906 | 12.79353 |
| 2222.983 | 12.51899 |
| 2223.059 | 11.76917 |
| 2223.135 | 11.30019 |
| 2223.211 | 11.01625 |
| 2223.287 | 10.77345 |
| 2223.364 | 10.67898 |
| 2223.44  | 10.7821  |
| 2223.516 | 11.24942 |
| 2223.592 | 12.02648 |
| 2223.668 | 12.71689 |
| 2223.745 | 12.76277 |
| 2223.821 | 12.51042 |
| 2223.897 | 12.90523 |
| 2223.973 | 13.72584 |
| 2224.049 | 13.88169 |
| 2224.126 | 13.84927 |
| 2224.202 | 15.32193 |
| 2224.278 | 18.71335 |
| 2224.354 | 23.298   |
| 2224.43  | 28.34035 |
| 2224.507 | 31.94472 |
| 2224.583 | 31.53525 |
| 2224.659 | 27.01219 |
| 2224.735 | 21.63016 |
| 2224.811 | 17.67319 |

|          |          |
|----------|----------|
| 2224.888 | 14.94901 |
| 2224.964 | 12.99609 |
| 2225.04  | 12.09425 |
| 2225.116 | 11.6865  |
| 2225.192 | 11.33622 |
| 2225.269 | 11.50087 |
| 2225.345 | 11.79752 |
| 2225.421 | 11.23234 |
| 2225.497 | 10.23964 |
| 2225.573 | 10.10455 |
| 2225.65  | 10.84551 |
| 2225.726 | 11.29876 |
| 2225.802 | 10.83061 |
| 2225.878 | 10.07642 |
| 2225.954 | 9.572624 |
| 2226.031 | 9.450169 |
| 2226.107 | 9.471684 |
| 2226.183 | 9.416552 |
| 2226.259 | 9.112753 |
| 2226.335 | 8.590752 |
| 2226.412 | 8.2777   |
| 2226.488 | 8.723507 |
| 2226.564 | 9.825953 |
| 2226.64  | 10.54855 |
| 2226.716 | 10.70771 |
| 2226.793 | 10.81    |
| 2226.869 | 10.86446 |
| 2226.945 | 11.09071 |
| 2227.021 | 11.71305 |
| 2227.097 | 12.26717 |
| 2227.174 | 12.2015  |
| 2227.25  | 11.86446 |
| 2227.326 | 11.74833 |
| 2227.402 | 12.0868  |
| 2227.478 | 12.78616 |
| 2227.555 | 13.05874 |
| 2227.631 | 12.70922 |
| 2227.707 | 12.40263 |
| 2227.783 | 12.15969 |
| 2227.859 | 11.49425 |
| 2227.936 | 11.18285 |
| 2228.012 | 11.92321 |
| 2228.088 | 13.78834 |
| 2228.164 | 16.96518 |
| 2228.24  | 21.18112 |
| 2228.317 | 24.8197  |
| 2228.393 | 26.39609 |

|          |          |
|----------|----------|
| 2228.469 | 25.31967 |
| 2228.545 | 22.09087 |
| 2228.621 | 18.60414 |
| 2228.698 | 16.87056 |
| 2228.774 | 16.72328 |
| 2228.85  | 16.33012 |
| 2228.926 | 15.28891 |
| 2229.002 | 14.18789 |
| 2229.079 | 13.31095 |
| 2229.155 | 13.21948 |
| 2229.231 | 14.05303 |
| 2229.307 | 14.86198 |
| 2229.383 | 15.74577 |
| 2229.46  | 17.92915 |
| 2229.536 | 21.95103 |
| 2229.612 | 26.74036 |
| 2229.688 | 30.12012 |
| 2229.764 | 29.86214 |
| 2229.841 | 26.13637 |
| 2229.917 | 21.72154 |
| 2229.993 | 19.56375 |
| 2230.069 | 19.95126 |
| 2230.145 | 21.56697 |
| 2230.222 | 23.67424 |
| 2230.298 | 26.12938 |
| 2230.374 | 28.8495  |
| 2230.45  | 31.26288 |
| 2230.526 | 32.61685 |
| 2230.603 | 32.09801 |
| 2230.679 | 30.10268 |
| 2230.755 | 27.91922 |
| 2230.831 | 26.04041 |
| 2230.907 | 24.25438 |
| 2230.984 | 22.73877 |
| 2231.06  | 21.57179 |
| 2231.136 | 20.82903 |
| 2231.212 | 21.27364 |
| 2231.288 | 22.90915 |
| 2231.365 | 24.69153 |
| 2231.441 | 25.34358 |
| 2231.517 | 24.20383 |
| 2231.593 | 22.12666 |
| 2231.669 | 20.8786  |
| 2231.746 | 20.37315 |
| 2231.822 | 19.82874 |
| 2231.898 | 19.85416 |
| 2231.974 | 21.24326 |

|          |          |
|----------|----------|
| 2232.05  | 23.46806 |
| 2232.127 | 26.07243 |
| 2232.203 | 28.16533 |
| 2232.279 | 28.5284  |
| 2232.355 | 26.99171 |
| 2232.431 | 24.29417 |
| 2232.508 | 21.2243  |
| 2232.584 | 18.80586 |
| 2232.66  | 17.44995 |
| 2232.736 | 16.7363  |
| 2232.812 | 16.22385 |
| 2232.889 | 16.0947  |
| 2232.965 | 16.26077 |
| 2233.041 | 16.11328 |
| 2233.117 | 15.84182 |
| 2233.193 | 16.51749 |
| 2233.27  | 18.94081 |
| 2233.346 | 22.44452 |
| 2233.422 | 25.66754 |
| 2233.498 | 27.41219 |
| 2233.574 | 27.29297 |
| 2233.651 | 25.57977 |
| 2233.727 | 23.54134 |
| 2233.803 | 23.49831 |
| 2233.879 | 25.99969 |
| 2233.955 | 29.14284 |
| 2234.032 | 31.4021  |
| 2234.108 | 32.74998 |
| 2234.184 | 32.87508 |
| 2234.26  | 31.27116 |
| 2234.336 | 28.57698 |
| 2234.413 | 26.40173 |
| 2234.489 | 25.03423 |
| 2234.565 | 23.99849 |
| 2234.641 | 23.43835 |
| 2234.717 | 23.52914 |
| 2234.794 | 23.44228 |
| 2234.87  | 22.73199 |
| 2234.946 | 22.49739 |
| 2235.022 | 24.1311  |
| 2235.098 | 27.31215 |
| 2235.175 | 30.90944 |
| 2235.251 | 33.74323 |
| 2235.327 | 34.37262 |
| 2235.403 | 32.36578 |
| 2235.479 | 29.29785 |
| 2235.556 | 26.47034 |

|          |          |
|----------|----------|
| 2235.632 | 24.34486 |
| 2235.708 | 22.82076 |
| 2235.784 | 21.46613 |
| 2235.86  | 20.25243 |
| 2235.937 | 19.53772 |
| 2236.013 | 19.2058  |
| 2236.089 | 18.67506 |
| 2236.165 | 17.89598 |
| 2236.241 | 17.02362 |
| 2236.318 | 16.19601 |
| 2236.394 | 15.47056 |
| 2236.47  | 14.59647 |
| 2236.546 | 13.85957 |
| 2236.622 | 13.49447 |
| 2236.699 | 13.1569  |
| 2236.775 | 12.78947 |
| 2236.851 | 12.74539 |
| 2236.927 | 13.04739 |
| 2237.003 | 13.47973 |
| 2237.08  | 14.39977 |
| 2237.156 | 16.53471 |
| 2237.232 | 20.7906  |
| 2237.308 | 26.15547 |
| 2237.384 | 29.21858 |
| 2237.461 | 28.66161 |
| 2237.537 | 26.45003 |
| 2237.613 | 24.54005 |
| 2237.689 | 23.34276 |
| 2237.765 | 22.42453 |
| 2237.842 | 21.01587 |
| 2237.918 | 19.07928 |
| 2237.994 | 17.23843 |
| 2238.07  | 15.73675 |
| 2238.146 | 14.76194 |
| 2238.223 | 14.55134 |
| 2238.299 | 14.54803 |
| 2238.375 | 14.93547 |
| 2238.451 | 16.63077 |
| 2238.527 | 19.51846 |
| 2238.604 | 21.8947  |
| 2238.68  | 23.01219 |
| 2238.756 | 23.11177 |
| 2238.832 | 22.17804 |
| 2238.908 | 20.94456 |
| 2238.985 | 20.47484 |
| 2239.061 | 20.77351 |
| 2239.137 | 20.91606 |

|          |          |
|----------|----------|
| 2239.213 | 20.23648 |
| 2239.289 | 18.33095 |
| 2239.366 | 15.90177 |
| 2239.442 | 14.45085 |
| 2239.518 | 14.19353 |
| 2239.594 | 14.21151 |
| 2239.67  | 13.84716 |
| 2239.747 | 13.27243 |
| 2239.823 | 12.75359 |
| 2239.899 | 12.28026 |
| 2239.975 | 11.81895 |
| 2240.051 | 11.56299 |
| 2240.128 | 11.43971 |
| 2240.204 | 11.32223 |
| 2240.28  | 11.41369 |
| 2240.356 | 11.63874 |
| 2240.432 | 11.75683 |
| 2240.509 | 11.88123 |
| 2240.585 | 12.23287 |
| 2240.661 | 12.48063 |
| 2240.737 | 12.31305 |
| 2240.813 | 12.3897  |
| 2240.89  | 13.42182 |
| 2240.966 | 15.47198 |
| 2241.042 | 18.55261 |
| 2241.118 | 22.86461 |
| 2241.194 | 27.39362 |
| 2241.271 | 30.15233 |
| 2241.347 | 29.81723 |
| 2241.423 | 26.97931 |
| 2241.499 | 22.92741 |
| 2241.575 | 19.3387  |
| 2241.652 | 17.15555 |
| 2241.728 | 16.15511 |
| 2241.804 | 15.70463 |
| 2241.88  | 15.99037 |
| 2241.956 | 17.56992 |
| 2242.033 | 20.56216 |
| 2242.109 | 24.24542 |
| 2242.185 | 27.6228  |
| 2242.261 | 30.23265 |
| 2242.337 | 31.95058 |
| 2242.414 | 32.57661 |
| 2242.49  | 32.14412 |
| 2242.566 | 30.797   |
| 2242.642 | 28.76103 |
| 2242.718 | 26.06319 |

|          |          |
|----------|----------|
| 2242.795 | 23.00067 |
| 2242.871 | 20.16307 |
| 2242.947 | 18.41211 |
| 2243.023 | 17.9481  |
| 2243.099 | 17.6683  |
| 2243.176 | 16.51402 |
| 2243.252 | 14.71358 |
| 2243.328 | 13.59827 |
| 2243.404 | 13.63408 |
| 2243.48  | 13.74946 |
| 2243.557 | 13.17962 |
| 2243.633 | 12.89207 |
| 2243.709 | 13.15961 |
| 2243.785 | 13.35262 |
| 2243.861 | 13.08891 |
| 2243.938 | 12.5818  |
| 2244.014 | 12.37601 |
| 2244.09  | 12.75856 |
| 2244.166 | 13.20745 |
| 2244.242 | 13.13404 |
| 2244.319 | 12.44979 |
| 2244.395 | 11.52381 |
| 2244.471 | 10.88612 |
| 2244.547 | 10.57608 |
| 2244.623 | 10.50575 |
| 2244.7   | 10.28755 |
| 2244.776 | 9.640017 |
| 2244.852 | 9.093872 |
| 2244.928 | 9.222038 |
| 2245.004 | 9.780668 |
| 2245.081 | 10.53652 |
| 2245.157 | 11.27161 |
| 2245.233 | 12.17796 |
| 2245.309 | 13.30207 |
| 2245.385 | 15.21685 |
| 2245.462 | 18.86469 |
| 2245.538 | 23.78188 |
| 2245.614 | 27.2877  |
| 2245.69  | 27.51794 |
| 2245.766 | 24.99948 |
| 2245.843 | 21.47853 |
| 2245.919 | 18.38797 |
| 2245.995 | 16.29048 |
| 2246.071 | 15.02339 |
| 2246.147 | 14.6228  |
| 2246.224 | 14.84476 |
| 2246.3   | 15.04709 |



|          |          |
|----------|----------|
| 2246.376 | 14.76984 |
| 2246.452 | 14.65318 |
| 2246.528 | 15.11373 |
| 2246.605 | 15.15878 |
| 2246.681 | 14.5366  |
| 2246.757 | 14.33178 |
| 2246.833 | 14.79271 |
| 2246.909 | 14.99978 |
| 2246.986 | 14.80211 |
| 2247.062 | 14.41775 |
| 2247.138 | 13.42084 |
| 2247.214 | 11.77104 |
| 2247.29  | 10.06792 |
| 2247.367 | 9.052879 |
| 2247.443 | 9.195711 |
| 2247.519 | 10.10486 |
| 2247.595 | 11.12185 |
| 2247.671 | 12.29545 |
| 2247.748 | 13.29289 |
| 2247.824 | 13.68131 |
| 2247.9   | 13.61896 |
| 2247.976 | 13.28853 |
| 2248.052 | 13.01354 |
| 2248.129 | 13.356   |
| 2248.205 | 14.45626 |
| 2248.281 | 15.67259 |
| 2248.357 | 16.1991  |
| 2248.433 | 15.88289 |
| 2248.51  | 15.93088 |
| 2248.586 | 16.77797 |
| 2248.662 | 17.73907 |
| 2248.738 | 18.57292 |
| 2248.814 | 19.35156 |
| 2248.891 | 19.77548 |
| 2248.967 | 20.21037 |
| 2249.043 | 21.27892 |
| 2249.119 | 21.79541 |
| 2249.195 | 20.80309 |
| 2249.272 | 19.00911 |
| 2249.348 | 16.97316 |
| 2249.424 | 15.20895 |
| 2249.5   | 14.88914 |
| 2249.576 | 15.49718 |
| 2249.653 | 15.42302 |
| 2249.729 | 15.40925 |
| 2249.805 | 16.16879 |
| 2249.881 | 16.62686 |

|          |          |
|----------|----------|
| 2249.957 | 16.1891  |
| 2250.034 | 15.66672 |
| 2250.11  | 15.42528 |
| 2250.186 | 15.34983 |
| 2250.262 | 15.89861 |
| 2250.338 | 16.8595  |
| 2250.415 | 17.18068 |
| 2250.491 | 16.36014 |
| 2250.567 | 15.32328 |
| 2250.643 | 14.85371 |
| 2250.719 | 14.82588 |
| 2250.796 | 14.59045 |
| 2250.872 | 13.6953  |
| 2250.948 | 12.94562 |
| 2251.024 | 13.45807 |
| 2251.1   | 15.12629 |
| 2251.177 | 16.96179 |
| 2251.253 | 17.96066 |
| 2251.329 | 17.85852 |
| 2251.405 | 17.20821 |
| 2251.481 | 17.31779 |
| 2251.558 | 18.86732 |
| 2251.634 | 21.86024 |
| 2251.71  | 25.35631 |
| 2251.786 | 29.14764 |
| 2251.862 | 32.68507 |
| 2251.939 | 33.94841 |
| 2252.015 | 32.28079 |
| 2252.091 | 30.02971 |
| 2252.167 | 29.54622 |
| 2252.243 | 31.32674 |
| 2252.32  | 35.22754 |
| 2252.396 | 40.57669 |
| 2252.472 | 46.35141 |
| 2252.548 | 51.09584 |
| 2252.624 | 52.95546 |
| 2252.701 | 50.60085 |
| 2252.777 | 44.0025  |
| 2252.853 | 36.15532 |
| 2252.929 | 30.50824 |
| 2253.005 | 27.36661 |
| 2253.082 | 25.33434 |
| 2253.158 | 24.06198 |
| 2253.234 | 23.28673 |
| 2253.31  | 23.17503 |
| 2253.386 | 23.83542 |
| 2253.463 | 23.73607 |

|          |          |
|----------|----------|
| 2253.539 | 21.88245 |
| 2253.615 | 19.78542 |
| 2253.691 | 18.29019 |
| 2253.767 | 17.23543 |
| 2253.844 | 17.34473 |
| 2253.92  | 18.34833 |
| 2253.996 | 18.75705 |
| 2254.072 | 18.26152 |
| 2254.148 | 18.22618 |
| 2254.225 | 19.17278 |
| 2254.301 | 20.35321 |
| 2254.377 | 21.0956  |
| 2254.453 | 21.29523 |
| 2254.529 | 20.92471 |
| 2254.606 | 20.15013 |
| 2254.682 | 19.37247 |
| 2254.758 | 17.97797 |
| 2254.834 | 16.07634 |
| 2254.91  | 14.9396  |
| 2254.987 | 15.11207 |
| 2255.063 | 16.13162 |
| 2255.139 | 18.81934 |
| 2255.215 | 24.25017 |
| 2255.291 | 30.21632 |
| 2255.368 | 32.89034 |
| 2255.444 | 32.08867 |
| 2255.52  | 30.22414 |
| 2255.596 | 27.98466 |
| 2255.672 | 25.50485 |
| 2255.749 | 23.42964 |
| 2255.825 | 21.65234 |
| 2255.901 | 20.27779 |
| 2255.977 | 19.68349 |
| 2256.053 | 20.17706 |
| 2256.13  | 21.04198 |
| 2256.206 | 21.15945 |
| 2256.282 | 20.05588 |
| 2256.358 | 18.87544 |
| 2256.434 | 18.22678 |
| 2256.511 | 18.01083 |
| 2256.587 | 18.68973 |
| 2256.663 | 21.12952 |
| 2256.739 | 24.8325  |
| 2256.815 | 28.36652 |
| 2256.892 | 30.40994 |
| 2256.968 | 30.11351 |
| 2257.044 | 27.87762 |

|          |          |
|----------|----------|
| 2257.12  | 24.84633 |
| 2257.196 | 22.12019 |
| 2257.273 | 20.31485 |
| 2257.349 | 19.45055 |
| 2257.425 | 19.27995 |
| 2257.501 | 19.89508 |
| 2257.577 | 20.93126 |
| 2257.654 | 22.34615 |
| 2257.73  | 24.60187 |
| 2257.806 | 27.28793 |
| 2257.882 | 29.26288 |
| 2257.958 | 30.10281 |
| 2258.035 | 29.53705 |
| 2258.111 | 27.41144 |
| 2258.187 | 24.89876 |
| 2258.263 | 23.84129 |
| 2258.339 | 24.7375  |
| 2258.416 | 26.2692  |
| 2258.492 | 27.55164 |
| 2258.568 | 28.87875 |
| 2258.644 | 29.84882 |
| 2258.72  | 29.38834 |
| 2258.797 | 27.36487 |
| 2258.873 | 24.97818 |
| 2258.949 | 23.6252  |
| 2259.025 | 23.90416 |
| 2259.101 | 24.59886 |
| 2259.178 | 24.2115  |
| 2259.254 | 23.03943 |
| 2259.33  | 22.46635 |
| 2259.406 | 22.97006 |
| 2259.482 | 24.34915 |
| 2259.559 | 27.14795 |
| 2259.635 | 31.0079  |
| 2259.711 | 33.59241 |
| 2259.787 | 33.15923 |
| 2259.863 | 31.00293 |
| 2259.94  | 28.95178 |
| 2260.016 | 27.47476 |
| 2260.092 | 26.67003 |
| 2260.168 | 26.60347 |
| 2260.244 | 26.28003 |
| 2260.321 | 24.58887 |
| 2260.397 | 22.33441 |
| 2260.473 | 21.21948 |
| 2260.549 | 21.59955 |
| 2260.625 | 22.60632 |

|          |          |
|----------|----------|
| 2260.702 | 23.30786 |
| 2260.778 | 23.48326 |
| 2260.854 | 23.40453 |
| 2260.93  | 22.94014 |
| 2261.006 | 21.5778  |
| 2261.083 | 19.56111 |
| 2261.159 | 18.08011 |
| 2261.235 | 17.94487 |
| 2261.311 | 19.17827 |
| 2261.387 | 21.77368 |
| 2261.464 | 25.33945 |
| 2261.54  | 28.62874 |
| 2261.616 | 30.71425 |
| 2261.692 | 30.76871 |
| 2261.768 | 29.07454 |
| 2261.845 | 26.70959 |
| 2261.921 | 24.07974 |
| 2261.997 | 21.66544 |
| 2262.073 | 20.96968 |
| 2262.149 | 21.52162 |
| 2262.226 | 21.49042 |
| 2262.302 | 20.7354  |
| 2262.378 | 19.93622 |
| 2262.454 | 19.73781 |
| 2262.53  | 19.71599 |
| 2262.607 | 19.30011 |
| 2262.683 | 18.7654  |
| 2262.759 | 18.3593  |
| 2262.835 | 17.33922 |
| 2262.911 | 15.55374 |
| 2262.988 | 14.26837 |
| 2263.064 | 13.55841 |
| 2263.14  | 12.99684 |
| 2263.216 | 12.73215 |
| 2263.292 | 12.75051 |
| 2263.369 | 12.28552 |
| 2263.445 | 11.51877 |
| 2263.521 | 11.58413 |
| 2263.597 | 12.65032 |
| 2263.673 | 13.91328 |
| 2263.75  | 14.81174 |
| 2263.826 | 14.84573 |
| 2263.902 | 13.87296 |
| 2263.978 | 12.56646 |
| 2264.054 | 11.82302 |
| 2264.131 | 12.06251 |
| 2264.207 | 13.07935 |

|          |          |
|----------|----------|
| 2264.283 | 14.22339 |
| 2264.359 | 14.89477 |
| 2264.435 | 15.06461 |
| 2264.512 | 14.46852 |
| 2264.588 | 13.35442 |
| 2264.664 | 12.43851 |
| 2264.74  | 12.21437 |
| 2264.816 | 12.96698 |
| 2264.893 | 14.60662 |
| 2264.969 | 16.29515 |
| 2265.045 | 17.57849 |
| 2265.121 | 18.2364  |
| 2265.197 | 17.95547 |
| 2265.274 | 17.84167 |
| 2265.35  | 19.75758 |
| 2265.426 | 23.98775 |
| 2265.502 | 29.88936 |
| 2265.578 | 36.42468 |
| 2265.655 | 41.91321 |
| 2265.731 | 45.7791  |
| 2265.807 | 47.73555 |
| 2265.883 | 46.88982 |
| 2265.959 | 43.23068 |
| 2266.036 | 38.59572 |
| 2266.112 | 34.75125 |
| 2266.188 | 31.65552 |
| 2266.264 | 29.67876 |
| 2266.34  | 28.90733 |
| 2266.417 | 27.9147  |
| 2266.493 | 26.54306 |
| 2266.569 | 26.36674 |
| 2266.645 | 26.64394 |
| 2266.721 | 25.59225 |
| 2266.798 | 23.86552 |
| 2266.874 | 22.30643 |
| 2266.95  | 20.52719 |
| 2267.026 | 18.83385 |
| 2267.102 | 17.78285 |
| 2267.179 | 16.87988 |
| 2267.255 | 16.04355 |
| 2267.331 | 16.07726 |
| 2267.407 | 16.99203 |
| 2267.483 | 18.0094  |
| 2267.56  | 18.55028 |
| 2267.636 | 18.30832 |
| 2267.712 | 17.32712 |
| 2267.788 | 16.37909 |

|          |          |
|----------|----------|
| 2267.864 | 15.89673 |
| 2267.941 | 15.47605 |
| 2268.017 | 14.85318 |
| 2268.093 | 14.64604 |
| 2268.169 | 15.19421 |
| 2268.245 | 15.43851 |
| 2268.322 | 14.59255 |
| 2268.398 | 13.7809  |
| 2268.474 | 13.91704 |
| 2268.55  | 14.09823 |
| 2268.626 | 13.8261  |
| 2268.703 | 13.49131 |
| 2268.779 | 12.8771  |
| 2268.855 | 12.41617 |
| 2268.931 | 12.63084 |
| 2269.007 | 13.2528  |
| 2269.084 | 14.42896 |
| 2269.16  | 16.78391 |
| 2269.236 | 20.51396 |
| 2269.312 | 25.29102 |
| 2269.388 | 29.03813 |
| 2269.465 | 30.38683 |
| 2269.541 | 29.81895 |
| 2269.617 | 27.3271  |
| 2269.693 | 23.59842 |
| 2269.769 | 21.20068 |
| 2269.846 | 20.26747 |
